RESEARCH

# Thermodynamic genome-scale metabolic modeling of metallodrug resistance in colorectal cancer

Helena A. Herrmann<sup>1†</sup>, Mate Ruzs<sup>1,2†</sup>, Dina Baier<sup>2</sup>, Michael A. Jakupec<sup>2,3</sup>, Bernhard K. Keppler<sup>2,3</sup>, Walter Berger<sup>3,4</sup>, Gunda Koellensperger<sup>1,5,6</sup> and Jürgen Zanghellini<sup>1\*</sup>

## Abstract

**Background:** Mass spectrometry-based metabolomics approaches provide an immense opportunity to enhance our understanding of the mechanisms that underpin the cellular reprogramming of cancers. Accurate comparative metabolic profiling of heterogeneous conditions, however, is still a challenge.

**Methods:** Measuring both intracellular and extracellular metabolite concentrations, we constrain four instances of a thermodynamic genome-scale metabolic model of the HCT116 colorectal carcinoma cell line to compare the metabolic flux profiles of cells that are either sensitive or resistant to ruthenium- or platinum-based treatments with BOLD-100/KP1339 and oxaliplatin, respectively.

**Results:** Normalizing according to growth rate and normalizing resistant cells according to their respective sensitive controls, we are able to dissect metabolic responses specific to the drug and to the resistance states. We find the normalization steps to be crucial in the interpretation of the metabolomics data and show that the metabolic reprogramming in resistant cells is limited to a select number of pathways.

**Conclusions:** Here we elucidate the key importance of normalization steps in the interpretation of metabolomics data, allowing us to uncover drug-specific metabolic reprogramming during acquired metal-drug resistance.

**Keywords:** omics data integration; constraint-based modeling; data normalization

## Background

A reprogramming of metabolism is a hallmark of multiple diseases, including cancer [1]. Changes in glucose, amino acid, lipid, and cholesterol metabolism, for example, have all been associated with aberrant metabolic phenotypes observed in cancers [2]. Resulting differences in metabolism between healthy and cancerous cells hold the potential for selectively targeting cancerous cells through pharmacological and dietary interventions. As such, understanding the extent to which metabolic reprogramming occurs in different cancer cells is a fundamental requirement for better treatment options. However, not only malignant transformation, but also therapy response on drug resistance acquisition might be paralleled or even driven by metabolic changes in the malignant cells [3, 4]. Especially, in case of acquired therapy resistance, dissection of the respective metabolic alterations and mechanism on a larger scale are only at the beginning.

*In silico* methods have the potential to integrate existing experimental data and to generate new hypotheses about the underlying mechanisms associated with metabolic reprogramming. Genome-scale metabolic models (GSMMs), which capture the known biochemical reactions of a given system, have previously been applied in various cancer studies [5, 6] and have led to the discovery of new drug targets and biomarkers [7, 8, 9, 10, 11]. There are, however, areas of cancer research, where GSMMs have not yet been applied due to a lack of available experimental data. For example, GSMMs have not yet been used extensively to study acquired drug resistance against different drug classes in different cancer cell types. Acquired therapy resistance is considered a major obstacle for curative systemic cancer treatment at progressed stages and also affects the success of anticancer metal drugs. [12, 13, 14, 15].

\* Correspondence: {gunda.koellensperger, juergen.zanghellini}@univie.ac.at

<sup>1</sup> Department of Analytical Chemistry, University of Vienna, Vienna, Austria

Full list of author information is available at the end of the article

<sup>†</sup> Equal contributor

<sup>1</sup> Metal-based drug treatments involving oxaliplatin  
<sup>2</sup> are a standard therapy for colorectal cancer, the third  
<sup>3</sup> most commonly diagnosed cancer [16, 17, 18, 19]. Drug  
<sup>4</sup> resistance, however, has been reported to develop in  
<sup>5</sup> nearly all patients with colorectal cancer; even when  
<sup>6</sup> using modern targeted and immunotherapy options,  
<sup>7</sup> chemotherapy remains a major part of the colorec-  
<sup>8</sup> tal cancer treatment regimen [13, 14]. Platinum-based  
<sup>9</sup> drugs are still prescribed in different lines of sys-  
<sup>10</sup> temic cancer treatment in diverse tumor types and pa-  
<sup>11</sup> tient cohorts [20]. Although platinum-based anticancer  
<sup>12</sup> drugs like oxaliplatin are widely-used, intrinsic and ac-  
<sup>13</sup> quired resistances remain a crucial impediment in the  
<sup>14</sup> treatment of colorectal cancer.  
<sup>15</sup>

<sup>16</sup> Acquired resistance against platinum drugs is thought  
<sup>17</sup> to be mainly based on elevated DNA-repair mech-  
<sup>18</sup> anisms, detoxification, evading apoptosis and au-  
<sup>19</sup> tophagy [21]. However, there is an increasing amount  
<sup>20</sup> of evidence that metabolic alterations might play a  
<sup>21</sup> pivotal role as well [22]. The clinically-investigated  
<sup>22</sup> ruthenium-based anticancer drug BOLD-100/KP1339  
<sup>23</sup> has shown promising results with regards to colorec-  
<sup>24</sup> tal cancer treatment [23]. BOLD-100/KP1339 (sodium  
<sup>25</sup> trans-[tetrachloridobis (1H-indazole) ruthenate(III)])  
<sup>26</sup> is a prodrug [24] displaying preferential activation by  
<sup>27</sup> reduction in the hypoxic milieu of solid tumors and  
<sup>28</sup> does not primarily target DNA [25] and metabolic al-  
<sup>29</sup> terations are expected to be relevant. Unlike BOLD-  
<sup>30</sup> 100/KP1339, which is still under investigation for  
<sup>31</sup> clinical applications, oxaliplatin is an already widely-  
<sup>32</sup> applied, clinical cancer treatment. As a result, the  
<sup>33</sup> body of literature addressing oxaliplatin resistance is  
<sup>34</sup> notably larger than that of BOLD-100/KP1339 resis-  
<sup>35</sup> tance. Nonetheless, the extent to which metallodrug  
<sup>36</sup> resistance results in an altered metabolic profile re-  
<sup>37</sup> mains poorly understood for both drug treatments  
<sup>38</sup> and has not yet been compared. As such, it is not  
<sup>39</sup> yet known whether metabolic reprogramming during  
<sup>40</sup> resistance development against anticancer compounds  
<sup>41</sup> with different metal centers and activity parameters  
<sup>42</sup> are comparable or drug-specific.

<sup>43</sup> Metabolomics aims to directly measure metabolite  
<sup>44</sup> abundance from a global and unbiased perspective  
<sup>45</sup> and has the potential to not only detect metabolic  
<sup>46</sup> alterations but to discover diagnostic and prognostic  
<sup>47</sup> markers and to generate hypotheses that can be val-  
<sup>48</sup> idated with genetic experiments [26]. Recent progress  
<sup>49</sup> in targeted and untargeted metabolomics approaches  
<sup>50</sup> have resulted in a wide-ranging toolkit for study-  
<sup>51</sup> ing metabolic phenotypes in terms of cellular concen-  
<sup>52</sup> trations. Mass spectrometry-based metabolomics ap-  
<sup>53</sup> proaches can be used for the metabolic profiling of  
<sup>54</sup> drug-treatment responses in cancer cell lines [27, 28].  
<sup>55</sup>

<sup>1</sup> While metabolomics studies provide an effective in-  
<sup>2</sup> terrogation window for the cellular changes that oc-  
<sup>3</sup> cur in response to a change in conditions, they do  
<sup>4</sup> not necessarily provide mechanistic insights into the  
<sup>5</sup> reprogramming of metabolism. Metabolite pools do  
<sup>6</sup> not inform about pathway activity, ergo correspond-  
<sup>7</sup> ing metabolic fluxes are sometimes measured. Measur-  
<sup>8</sup> ing metabolic fluxes, however, also suffers from several  
<sup>9</sup> practical limitations. For example, a prolonged time  
<sup>10</sup> for peripheral pathways to reach isotopic steady-state,  
<sup>11</sup> the fact that simple linear pathways can only be inves-  
<sup>12</sup> tigated with non-stationary labelling or an increased  
<sup>13</sup> number of samples, and the complex data analyses re-  
<sup>14</sup> quired for nonstationary labelling experiments often  
<sup>15</sup> hinder a successful and comprehensive application of  
<sup>16</sup> isotopic labelling methods[29].

<sup>17</sup> Recent trends in metabolomics have shown, it is al-  
<sup>18</sup> ways possible to measure more metabolites at more  
<sup>19</sup> time points and to analyse the obtained results in com-  
<sup>20</sup> bination with other ‘omics data sets [30, 31, 32, 33].  
<sup>21</sup> While multi-omics have allowed for the identifica-  
<sup>22</sup> tion of numerous regulatory mechanisms in cancer  
<sup>23</sup> [34, 35], their integration with fluxomics is required  
<sup>24</sup> to gain a holistic understanding of metabolic repro-  
<sup>25</sup> gramming. To understand the mechanisms that under-  
<sup>26</sup> pin a potential reprogramming of metabolism during  
<sup>27</sup> resistance development, observed changes in metabo-  
<sup>28</sup> lite concentrations need to be placed in the context  
<sup>29</sup> of changes in metabolic flux. GSMMs provide a plat-  
<sup>30</sup> form for doing so [36]. Multiple techniques for integrat-  
<sup>31</sup> ing omics data sets into GSMMs have been developed  
<sup>32</sup> [10, 37, 38, 39, 40]. While expression data sets are of-  
<sup>33</sup> ten used to generate system-specific models [41, 7],  
<sup>34</sup> metabolomics and proteomics data sets are used to  
<sup>35</sup> constrain the solution space of the generated models  
<sup>36</sup> [37, 40].

<sup>37</sup> Typically, constraint-based modelling (CBM) is em-  
<sup>38</sup> ployed to study GSMMs and to explore metabolic phe-  
<sup>39</sup> notypes in the form of steady-state fluxes [42, 43]. Flux  
<sup>40</sup> balance analysis (FBA), for example, uses linear opti-  
<sup>41</sup> mization techniques to model the fluxome of GSMMs  
<sup>42</sup> [see Orth et al [44] for a review]. FBA, however, can  
<sup>43</sup> lead to the prediction of thermodynamically infeas-  
<sup>44</sup> ible flux solutions. Thermodynamic flux analysis (TFA)  
<sup>45</sup> imposes additional constraints on stoichiometric mod-  
<sup>46</sup> els to ensure thermodynamically valid fluxes and pro-  
<sup>47</sup> vides a framework for integrating metabolomics data  
<sup>48</sup> into GSMMs [45, 46]; extracellular metabolite data are  
<sup>49</sup> used to constrain the directionality of exchange reac-  
<sup>50</sup> tions of the model and intracellular metabolite data  
<sup>51</sup> can be used to constraint reactions in the model. Both  
<sup>52</sup> intra- and extracellular metabolite data have previ-  
<sup>53</sup> ously been integrated into system-specific metabolic  
<sup>54</sup> models to draw physiological conclusions about can-  
<sup>55</sup> cerous and healthy cells [47, 48, 49, 50].

<sup>1</sup> In this work, we integrate experimentally deter-  
<sup>2</sup>mined absolute concentrations of intracellular metabo-  
<sup>3</sup>lites and medium-based metabolites and growth rates  
<sup>4</sup>of the colorectal cancer cell-line HCT116 into a cell-  
<sup>5</sup>line specific, thermodynamic, genome-scale metabolic  
<sup>6</sup>model (GSMM). We consider two different models of  
<sup>7</sup>acquired resistance in colon cancer: oxaliplatin resis-  
<sup>8</sup>tant (OxR) and BOLD-100/KP1339 resistant (RuR)  
<sup>9</sup>HCT116 cells as well as their sensitive controls to gen-  
<sup>10</sup>erate four model instances. To identify metabolic dif-  
<sup>11</sup>ferences between resistant and sensitive cells, we nor-  
<sup>12</sup>malize the calculated flux values by their representa-  
<sup>13</sup>tive growth rates. As oxaliplatin and BOLD-100 are  
<sup>14</sup>prepared in different solvents (water versus dimethyl-  
<sup>15</sup>sulfoxid (DMSO)), OxR and RuR cells were grown in  
<sup>16</sup>the same media, but RuR and its respective control  
<sup>17</sup>were exposed to a low DMSO background equivalent  
<sup>18</sup>to the drugs' stock solution solvent. To account for  
<sup>19</sup>metabolic difference that are the results of a differ-  
<sup>20</sup>ence in solvent, we further normalized the results ob-  
<sup>21</sup>tained for the resistant cells by their sensitive controls.  
<sup>22</sup>Eliminating both differences in growth rate and solvent  
<sup>23</sup>background, we are able to draw drug-specific conclu-  
<sup>24</sup>sions about the metabolic changes that occur upon  
<sup>25</sup>resistance. As a result, we are able to identify specific  
<sup>26</sup>changes in flux that are the direct result of an acquired  
<sup>27</sup>resistance to either OxR or RuR treatment.

## <sup>28</sup>Materials and Methods

### <sup>29</sup>Cell Culture

<sup>30</sup>HCT116 colon cancer cells were generously provided  
<sup>31</sup>by Dr. Vogelstein from John Hopkins University,  
<sup>32</sup>Baltimore. Cells were cultured in McCoy's medium  
<sup>33</sup>(Sigma Aldrich) supplemented with 10% fetal calf  
<sup>34</sup>serum (FCS; PAA, Linz, Austria) and 2 mM glutamine  
<sup>35</sup>(Sigma Aldrich). Cells were selected for acquired  
<sup>36</sup>drug resistance over several months via exposure to  
<sup>37</sup>increasing concentrations of oxaliplatin or BOLD-  
<sup>38</sup>100/KP1339 followed by drug-free recovery phases.  
<sup>39</sup>Finally, the oxaliplatin-resistant HCT116 (OxR) cells  
<sup>40</sup>were selected with 5  $\mu$ M of oxaliplatin [51, 52] for 24 h  
<sup>41</sup>and BOLD-100/KP1339-resistant (RuR) cells with  
<sup>42</sup>200  $\mu$ M of BOLD-100/KP1339 for 72 h in two-week-  
<sup>43</sup>intervals. All cultures were grown under standard cell  
<sup>44</sup>culture conditions and checked for *Mycoplasma* con-  
<sup>45</sup>tamination.

### <sup>46</sup>Cell viability assay

<sup>47</sup>Cells were seeded at densities of  $3.5 \times 10^4$  cells/well  
<sup>48</sup>cells in 96-well microtiter plates and allowed to adhere  
<sup>49</sup>overnight. Cells were exposed to indicated concentra-  
<sup>50</sup>tions of the respective drugs for 72 h. Cell viability  
<sup>51</sup>was determined using the 3-(4,5-dimethylthiazol-2-yl)-  
<sup>52</sup>2,5-diphenyltetrazolium bromide (MTT) assay (EZ4U,  
<sup>53</sup>Biomedica, Vienna, Austria) following the manufac-  
<sup>54</sup>turer's recommendations.  
<sup>55</sup>

### <sup>1</sup>Metabolomics experiment

<sup>2</sup>HCT116 cells, HCT116 cells with acquired oxaliplatin  
<sup>3</sup>resistance, and HCT116 cells with acquired BOLD-  
<sup>4</sup>100/KP1339 resistance were seeded as  $2 \times 10^5$  cells/well  
<sup>5</sup>in 12-well plate formate in 1 mL McCoy's medium  
<sup>6</sup>(Sigma Aldrich) supplemented with 2 mM glutamine  
<sup>7</sup>and 10% FCS. After overnight growth, wells were sup-  
<sup>8</sup>plemented with 1 mL fresh medium each. HCT116  
<sup>9</sup>with acquired BOLD-100/KP1339 resistance and its  
<sup>10</sup>sensitive control contained the same medium with  
<sup>11</sup>0.5% dimethyl sulfoxide (DMSO) used as BOLD-  
<sup>12</sup>100 solvent. 24 h after supplementing with additional  
<sup>13</sup>medium, cells are still not confluent. At this point, the  
<sup>14</sup>medium was removed and cells were washed 3-times  
<sup>15</sup>with 2 mL PBS (37 °C) and snap frozen with liquid  
<sup>16</sup>nitrogen.  
<sup>17</sup>

### <sup>18</sup>Metabolomics sample preparation

<sup>19</sup>The samples were randomized at the stages of the ex-  
<sup>20</sup>periment including seeding, sample preparation and  
<sup>21</sup>extraction as well as LC-MS measurement sequence.  
<sup>22</sup>Extraction and measurement of the metabolites were  
<sup>23</sup>based on a protocol described elsewhere [53]. Shortly,  
<sup>24</sup>the protocol comprised cell scraping and extraction  
<sup>25</sup>with 180  $\mu$ L cold 80% methanol containing 5 mM  
<sup>26</sup>N-ethylmaleimide (dissolved in 10 mM ammonium-  
<sup>27</sup>formate at pH 7) with 20  $\mu$ L fully <sup>13</sup>C-labeled internal  
<sup>28</sup>standard, ISOTopic solutions (Vienna, Austria). Af-  
<sup>29</sup>ter a centrifugation step (14,000 rcf, 4 °C, 10 min) cell  
<sup>30</sup>extracts were directly measured with high-resolution  
<sup>31</sup>OrbiTrap mass spectrometer.  
<sup>32</sup>

### <sup>33</sup>LC-MS analysis of metabolites

<sup>34</sup>The quantification of metabolites was based on Schwaiger  
<sup>35</sup>et al. [54] and the LC-MS gradient was adapted and  
<sup>36</sup>shortened to suit metabolites as described elsewhere  
<sup>37</sup>[55]. Full mass scan data was acquired both in positive  
<sup>38</sup>and negative ion mode.  
<sup>39</sup>

### <sup>40</sup>LC-MS analysis of coenzymes

<sup>41</sup>The analysis of free coenzyme A (CoA), acetyl-  
<sup>42</sup>coenzyme A, palmitoyl-coenzyme A (malonyl-coenzyme  
<sup>43</sup>A below LOD) was carried out in an additional mea-  
<sup>44</sup>surement series of the same samples and on the same  
<sup>45</sup>instrumental setup but a with a dedicated LC-MS  
<sup>46</sup>method. The same separation was used with the  
<sup>47</sup>same gradient and eluents, but flushing of the column  
<sup>48</sup>started already at 6 min instead of 7 min min, shorten-  
<sup>49</sup>ing the total measurement time from 15 min to 14 min.  
<sup>50</sup>The OrbiTrap MS settings were changed with regards  
<sup>51</sup>to the mass range to 750-1100 m/z and the capillary  
<sup>52</sup>temperature was lowered from 280 °C to 200 °C to re-  
<sup>53</sup>duce in-source fragmentation and the S-lense RF-level  
<sup>54</sup>was increased from 30 to 60.  
<sup>55</sup>

## <sup>1</sup>Determination of total protein content

<sup>2</sup>The applied extraction and centrifugation resulted in a  
<sup>3</sup>pellet containing the high-molecular fraction and non-  
<sup>4</sup>polar metabolites. This pellet was dissolved in 0.2 M  
<sup>5</sup>NaOH overnight, diluted 1:10 in the same NaOH solu-  
<sup>6</sup>tion and determined for total protein content with the  
<sup>7</sup>Thermo Micro BCA kit, according to manufacturer's  
<sup>8</sup>instructions.  
<sup>9</sup>

## <sup>10</sup>Data analysis of metabolomics measurement

<sup>11</sup>Targeted analysis of the data was done with Skyline  
<sup>12</sup>20.2 (MacCoss Lab Software) extracting the [M-H]<sup>-</sup>  
<sup>13</sup>and [M+H]<sup>+</sup> ions with 5 ppm mass tolerance. The ab-  
<sup>14</sup>solute concentrations relied on the external calibra-  
<sup>15</sup>tion with internal standardization. The compounds  
<sup>16</sup>were standardized compound-specifically where possi-  
<sup>17</sup>ble and class-specifically when the U<sup>13</sup>C equivalent  
<sup>18</sup>was not reliably available or by U<sup>13</sup>C-glutamate if nei-  
<sup>19</sup>ther of the aforementioned were available.

<sup>20</sup>Metabolites with technical repeatability (relative  
<sup>21</sup>standard deviation) above 30% were removed from  
<sup>22</sup>the dataset. This was based on the repeated injection  
<sup>23</sup>and measurement of a pooled quality control sample.  
<sup>24</sup>Furthermore, metabolites which had mean concentra-  
<sup>25</sup>tion below the determined lowest limit of quantifica-  
<sup>26</sup>tion (LOQ) according to the validation of the LC-MS  
<sup>27</sup>method described in [54] were removed.

<sup>28</sup>Datasets were combined by joining the metabolite  
<sup>29</sup>data acquired in both positive and negative mode,  
<sup>30</sup>as well as coenzyme data in the negative acquisition  
<sup>31</sup>mode. A further calibration was measured in positive  
<sup>32</sup>mode for several carnitines (propionyl-carnitine, O-  
<sup>33</sup>acetyl-carnitine, propionyl-carnitine, palmitoyl-carnitine)  
<sup>34</sup>with the method for metabolites, since these com-  
<sup>35</sup>pounds were not contained in our original calibration  
<sup>36</sup>mixture. Also the calibration row for coenzymes was  
<sup>37</sup>prepared freshly in this mixture to avoid degradation  
<sup>38</sup>by storage. The external calibration of the different  
<sup>39</sup>coenzymes (coenzyme A, acetyl coenzyme A, malonyl  
<sup>40</sup>coenzyme A, palmitoyl coenzyme A) was measured in  
<sup>41</sup>negative mode. For all primary thiols in the dataset  
<sup>42</sup>(coenzyme-A, glutathione, cysteine etc.) its N-ethyl  
<sup>43</sup>maleimide adduct was used for quantification after it  
<sup>44</sup>was made sure that the conversion was quantitative.  
<sup>45</sup>

## <sup>46</sup>Measurement of extracellular metabolite concentrations

<sup>47</sup>10<sup>5</sup> HCT116 cells as well as HCT116 cells with ac-  
<sup>48</sup>quired oxaliplatin resistance and HCT116 cells with  
<sup>49</sup>BOLD-100/KP1339 resistance were seeded ( $N = 4$  for  
<sup>50</sup>each respectively) into 12-well plate (StarLab) with  
<sup>51</sup>2 mL McCoy's 5A medium (Sigma-Aldrich) contain-  
<sup>52</sup>ing 10% FCS (BioWest) and 4 mM glutamine. Also  
<sup>53</sup>in the case of the sensitive HCT116 cells and the  
<sup>54</sup>BOLD-100/KP1339-resistant cells the experiment was  
<sup>55</sup>

run with and without 0.5% DMSO. 100  $\mu$ L of was col-  
lected from the starting medium at beginning of the  
experiment, and directly from the wells after 24 h, 48 h  
and 72 h after seeding. Also, a cell free experiment was  
run to determine the contribution of abiotic glutamine  
decay.

## Determination of dry-weight for the cell lines

Measurements were carried out as described by Szélieová  
et al. [56]

## HCT116-specific genome-scale metabolic model

Robinson et al. [57] provide the latest consensus  
GSMM of human metabolism called Human1. The au-  
thors used Human1 to generate cell-line specific mod-  
els using gene essentiality data from previous CRISPR  
knockout screens [58]. Using the tINIT algorithm [41]  
and RNA-Seq data from HCT116 colorectal carci-  
noma cells they select reactions from Human1 asso-  
ciated with moderately and highly expressed genes  
to build a cell-line specific model for HCT116. We  
obtained the model from the authors, removed the  
enzyme constraints and added a further seven ex-  
change reactions to the model to account for the ex-  
cretion or uptake of cis-aconitate, fumarate, isocitrate,  
malate, sarcosine, succinate and xanthine that we ob-  
served in our measured time-course of the medium  
composition. We use this updated model for all our  
analyses presented here. The model is available at  
[https://github.com/HAHerrmann/Hct116\\_DrugRes/blob/master/Models/Colon\\_Combined.xml](https://github.com/HAHerrmann/Hct116_DrugRes/blob/master/Models/Colon_Combined.xml).

Growth rates (Figure S1) and exchange rates (Fig-  
ure S2) were fitted as described in Szélieová et al. [59].  
In short, we fitted an exponential model to estimate  
the initial concentration,  $X_0$ , and the growth rate,  $\mu$ .  
The fitted growth rate and the initial biomass,  $B_0$ ,  
were then used to calculate the specific exchange rates  
for all of the measured medium-based metabolites.  $B_0$   
was calculated from the fitted  $X_0$  and the experimen-  
tally determined dry mass per cell (Figure S3). The fit-  
ting was done in Python (Version 3.7.9) using the opti-  
mize function in scipy (Version 1.5.2) with parameters  
`soft_l1` for the loss function and `f_scale = 0.3` for  
outlier detection. The obtained growth and exchange  
rates were used to constrain the respective import and  
export reactions of the model. Flux constraints were  
set such that the applied upper and lower bounds ac-  
counted for the relative standard error of the mea-  
surement. We further constrained the directionality of  
uptake and excretion rates of 50 metabolites, using  
HCT116 cell line specific data obtained by Jain et al.  
[60]. The "blood pool" reactions were removed from  
the model because we did not consider *in vivo* condi-  
tions. Instead, we allowed for an unconstrained influx

<sup>1</sup>of stearate, palmitate, oleate, linolenate, linoleate, and  
<sup>2</sup>arachidonate. These fatty acids have previously been  
<sup>3</sup>shown to make up the majority of lipids present in  
<sup>4</sup>fetal calf serum [61, 62] which was used as a growth  
<sup>5</sup>medium supplement.

## <sup>6</sup>Thermodynamic metabolic modeling

<sup>7</sup>The pyTFA package [46], <https://github.com/EPFL-LCSB/pytfa>, formulates thermodynamic flux analysis (TFA) of GSMM as a mixed-integer linear programming problem that incorporates metabolite concentrations as thermodynamic constraints into a traditional flux balance analysis (FBA) model. Masid *et al.* [48] have recently constructed an extensive thermodynamic database containing the thermodynamic information for compounds, reactions and compartments in human metabolism; this includes the Gibbs free energy formation of compounds and the associated error estimation, the pH, ionic strength and membrane potentials. Using Biopython (Version 1.78) we annotated the GSMM with SEED identifiers which allowed us to match the information in the GSMM to the thermodynamic database of Masid *et al.* [48]. This allowed us to achieve a thermodynamic coverage of 89% of the compounds and to estimate the Gibbs free energy for 20% of the reactions. We initially applied default metabolite concentrations from  $10^{-12}$  to 0.1 mol per total protein. We then scaled our measured metabolite concentrations to fall within that same range and applied them, condition-dependent, to different instances of the GSMM. Using a parsimonious FBA (pFBA) that maximizes a linear objective while minimizing the total sum of fluxes [63], we calculated the minimum total sum of fluxes and set this as an additional constraint to our linear model prior to performing a Flux Variability Analysis (FVA) on the thermodynamic model, here referred to as TFVA. TFVA applies the same constraints as TFA but instead of returning a single feasible solution, the lowest and highest possible flux value for each reaction is returned [64]. Because pFBA does not necessarily return a unique solution when two alternative pathways with the same total sum of fluxes exist, we chose to implement a parsimonious TFVA (pTFVA) to compare different model instances to one another. Upon parallelizing the existing TFVA implementation in pyTFA for an improved run time, we ran a pTFVA for different instances of the HCT116 cell-lines specific GSMM. Flux analyses were done in Python (Version 3.7.9) using cobrapy (Version 0.19.0) [65].

## <sup>49</sup>Data processing and flux normalization

<sup>50</sup>We constrained four different instances of the HCT116  
<sup>51</sup>model: oxaliplatin-resistant cells (OxR) and their sensitive parental counterpart (HCT116) and BOLD-  
<sup>52</sup>100/KP1339-resistant cells (RuR) and their sensitive parental counterpart in a DMSO-based medium

(HCT116-DMSO). Model instances were constrained<sup>1</sup> using the condition-specific exchange fluxes (Figure<sup>2</sup> S1) and growth rate (Figure S2). All blocked reactions were removed using the `find.blocked.reactions`<sup>3</sup> in cobrapy (Version 0.19.0) with default parameters,<sup>4</sup> resulting in a model with 4530 reactions and 4492 degrees of freedom. Upon calculating flux values for each<sup>5</sup> model instance using pTFVA as described, we divided<sup>6</sup> each set of flux values by the outgoing flux to biomass<sup>7</sup> production of that model instance, effectively normalizing<sup>8</sup> for difference in growth. We checked for reactions<sup>9</sup> for which both the upper and the lower bound differed<sup>10</sup> by at least 15%. Furthermore, we feature-scaled all<sup>11</sup> flux values to lie between 0 and 1 and divided the flux<sup>12</sup> values obtained in the drug-resistant instances by the<sup>13</sup> corresponding flux values obtained for their respective<sup>14</sup> controls. Having thus normalized for differences in the<sup>15</sup> medium composition, we were able to compare the flux<sup>16</sup> profiles of the two metallo-drug resistance to another<sup>17</sup> another, again checking for which reactions both the<sup>18</sup> upper and lower bounds differed by at least 15%.<sup>19</sup>

## <sup>22</sup>Results

<sup>23</sup>Differences in metabolite concentrations may not  
<sup>24</sup>correlate to changes in flux<sup>25</sup>

<sup>26</sup>To investigate the metabolic changes associated with<sup>27</sup> metallo-resistance in colorectal cancer, we compared<sup>28</sup> the metabolic profiles of resistant and sensitive cells.<sup>29</sup> Using the HCT116 colorectal cancer cell line, cells<sup>30</sup> with resistance to either oxaliplatin (OxR) or BOLD-<sup>31</sup>100/KP1339 (RuR) were compared to their sensitive<sup>32</sup> counterparts. The two acquired resistance models are<sup>33</sup> largely independent of one another: while OxR cells<sup>34</sup> show moderate cross-resistance for the ruthenium-<sup>35</sup>based drug, RuR cells display no cross-resistance and<sup>36</sup> remain sensitive to oxaliplatin treatment (Figure S5).<sup>37</sup> This implies a difference in the molecular basis of re-<sup>38</sup>sistance between the two models. OxR cells and their<sup>39</sup> parental sensitive counterparts were grown in a stan-<sup>40</sup>dard medium, while RuR cells and their parental sen-<sup>41</sup>sitive counterparts were grown in the same medium<sup>42</sup> but with a low solvent-background (DMSO) as out-<sup>43</sup>lined in the Materials and Methods. Relative differ-<sup>44</sup>ences in the cellular metabolite concentrations of sensi-<sup>45</sup>tive versus resistant cells highlight the extent to which<sup>46</sup> the acquired metallo-drug resistance results in an al-<sup>47</sup>tered metabolome (Figure 1). We observe that some re-<sup>48</sup>sponses, such as an increase in palmitoylcarnitine and<sup>49</sup> a decrease in lactate upon resistance, are shared across<sup>50</sup> the two metallo-resistance phenotypes. Nevertheless,<sup>51</sup> many of the metabolic changes associated with resis-<sup>52</sup>tance are drug-specific. Pyruvate and carnitine concen-<sup>53</sup>trations, for example, are higher in RuR cells but lower<sup>54</sup> in OxR cells when compared to their sensitive coun-<sup>55</sup>terparts. Palmitoyl-CoA, on the other hand, is lower

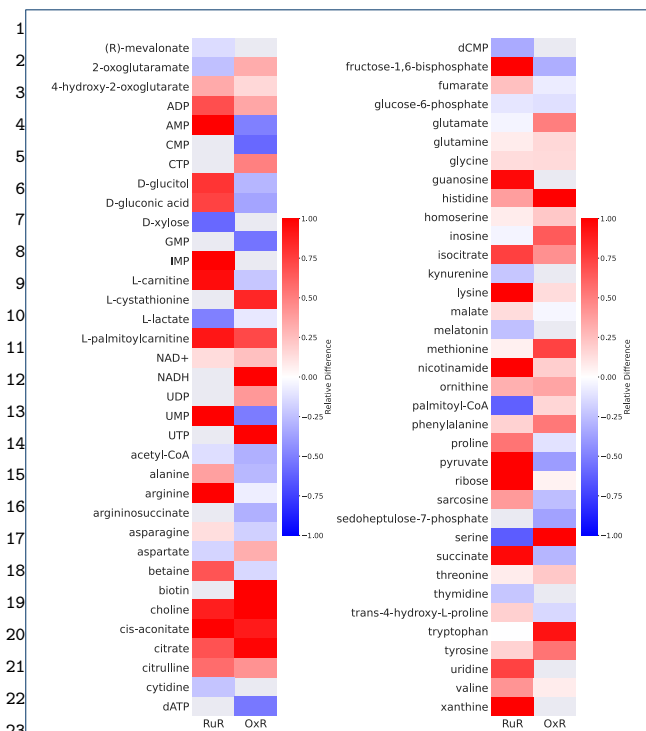

**Figure 1 Observed changes in metabolite concentrations upon acquired resistance.** Oxaliplatin (OxR) and BOLD-100/KP1339 (RuR) resistance models are compared to their sensitive counterparts. Relative differences in the measured metabolite concentrations of resistant and sensitive cells are shown. A positive relative difference (red) indicates a higher metabolite concentration in the resistant as compared to the parental sensitive model, whereas a negative relative difference (blue) indicates a lower metabolite concentration in the resistant than in the sensitive counterpart. Relative differences were calculated from using the mean values of six replicates. Only those metabolites for which we observed an absolute relative change greater than 15% between sensitive and resistant, in at least one of the two conditions, are shown. The following abbreviations were used: ADP - adenosine diphosphate, AMP - adenosine monophosphate, CMP - cytidine monophosphate, CTP - cytidine triphosphate, GMP - guanosine monophosphate, IMP - inosine monophosphate, NAD - nicotinamide adenine dinucleotide, UDP - uridine diphosphate, UMP - uridine monophosphate, UTP - uridine triphosphate, CoA - coenzyme A, dATP - deoxyadenosine triphosphate, dCMP - deoxycytidine monophosphate.

in RuR cells and higher in OxR cells when compared to their parental sensitive counterparts (Figure 1).

With the aim of investigating whether the observed changes in cellular metabolites concentrations (Figure 1) translate to changes in metabolic flux, we integrated experimentally determined growth rates (Figure S1), intracellular metabolite concentrations (Figure 1) and exchange rates (Figure S2) in a genome-scale metabolic model (GSMM) of HCT116. We constrained four instances of the GSMM: an oxaliplatin-resistant (OxR) and a parental sensitive counter-

part (sensitive), a BOLD-100/KP1339-resistant (RuR)<sup>1</sup> and a parental sensitive counterpart for the DMSO-containing medium (sensitive-DMSO).<sup>2</sup> Measuring 110<sup>3</sup> metabolite concentrations and 37 exchange fluxes,<sup>4</sup> we constrained the solution space of a model with 6479 metabolites and 6716 reactions. Growth rates<sup>6</sup> were used to constrain the biomass production of each model instance. Resistant cells grow slower than<sup>8</sup> sensitive cells and OxR cells grow even slower than<sup>9</sup> RuR cells (Figure S1). Exchange rates (Figure S2)<sup>10</sup> were determined from time-course measurements of<sup>11</sup> the medium composition and were applied as flux<sup>12</sup> bounds on the corresponding import and export reac-<sup>13</sup> tions of the model. Intracellular metabolite concen-<sup>14</sup> trations were applied as constraints using the pyTFA<sup>15</sup> package [46]. Using a parsimonious thermodynamic<sup>16</sup> flux variability analysis (pTFVA), as outlined in the<sup>17</sup> Materials and Methods, we calculated flux solutions<sup>18</sup> for each of the four model instances, each of which<sup>19</sup> was constrained with the corresponding experimen-<sup>20</sup> tal data. By incorporating the growth and exchange<sup>21</sup> rates as well as the intracellular metabolite concentra-<sup>22</sup> tions into a GSMM, we were able to calculate possible<sup>23</sup> changes in metabolic fluxes. Metabolic rates, rather<sup>24</sup> than concentrations, could then be normalized accord-<sup>25</sup> ing to the cellular growth rate observed under those<sup>26</sup> conditions. We compared the four sets of flux solutions<sup>27</sup> against one another, both before and after normaliz-<sup>28</sup> ing all flux values by the respective growth rate (Fig-<sup>29</sup> ure 2). Growth rate normalization was implemented<sup>30</sup> by dividing all of the calculated flux values by the ex-<sup>31</sup> perimentally measured growth rate used to constrain<sup>32</sup> that model instance.<sup>33</sup>

The maximum relative standard error observed<sup>34</sup> across the metabolite measurements was less than<sup>35</sup> 15%. Thus, when integrating the data into the GSMM<sup>36</sup> and comparing flux differences between condition-<sup>37</sup> specific instances of the model, we used a cutoff of<sup>38</sup> 15% to determine whether fluxes were significantly<sup>39</sup> different across conditions. Comparing resistant cells<sup>40</sup> to sensitive cells, we identify pathways with the most<sup>41</sup> prominent changes in flux upon acquired resistance<sup>42</sup> (Figure 2). Differences in flux observed prior to growth<sup>43</sup> standardization directly correspond to predictions of<sup>44</sup> *in vivo* fluxes. Differences in flux observed post growth<sup>45</sup> standardization are no longer predictions of *in vivo*<sup>46</sup> fluxes, but are predictions of flux differences that are<sup>47</sup> assumed to be the direct result of a metabolic re-<sup>48</sup> programming upon acquired resistance rather than<sup>49</sup> changes in growth rate.<sup>50</sup>

Initially, the oxidative phosphorylation pathway<sup>51</sup> shows the highest amount of flux changes in response<sup>52</sup> to OxR. Upon growth normalizing, however, it is<sup>53</sup> RuR that shows a higher number of flux changes in<sup>54</sup>

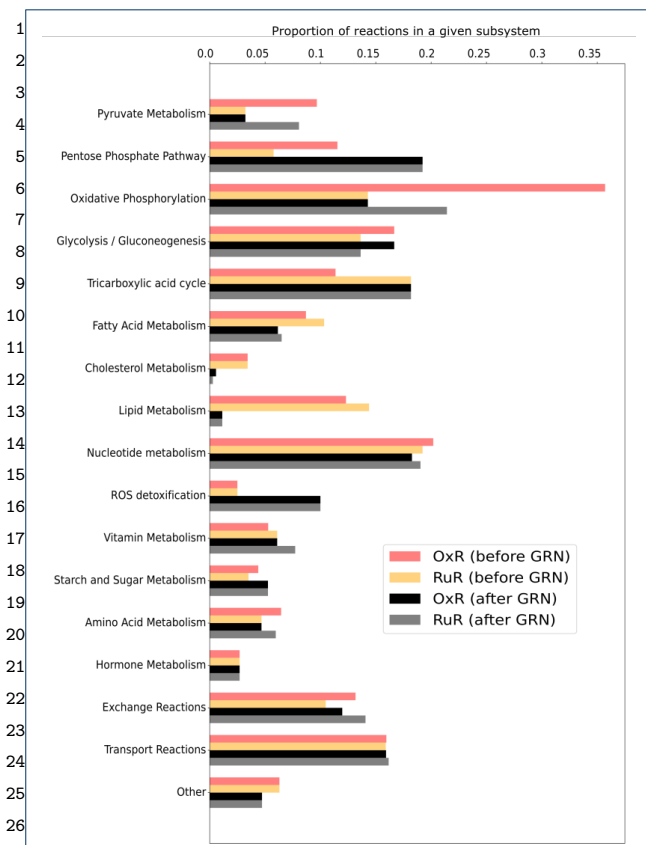

**Figure 2 Metabolic fluxes in resistant versus sensitive models before and after growth rate normalization.** Both intracellular and extracellular metabolite constraints were applied to generate four instances of the HCT-specific GSM [oxaliplatin (OxR) and BOLD-100/KP1339 (RuR) and their parental sensitive counterparts (sensitive and sensitive-DMSO, respectively)] as described in the Materials and Methods. A parsimonious thermodynamic flux variability analysis (pTFVA) was done on each model instance. Flux values of the resistant instances were compared to their respective controls. Metabolic reactions that had an absolute relative difference greater than 15% in both the highest possible and the lowest possible flux value were considered to be different. The proportion of reactions that show a difference in flux between the OxR and sensitive condition [OxR before growth rate normalization (GRN); red bars] and the RuR and sensitive conditions (RuR before GRN; orange bars) are shown for each subsystem. All flux values were then normalized according to the corresponding growth rate of that condition (Figure S1) and were again checked for a relative difference between OxR (OxR after GRN; black bars) and RuR (RuR after GRN; gray bars) and their sensitive controls. Subsystems for which no relative changes in flux between resistant and sensitive instances were observed were omitted from the figure for clarity.

this pathway. Furthermore, what initially appears to be significant differences in flux through the cholesterol and lipid metabolism, largely disappears upon growth normalization. Changes in the subsystem reactive oxygen species (ROS) detoxification seem minimal prior to growth normalization; the normalized results,

however, indicate significant changes in flux with regards to detoxification. While the number of reactions that appear to be affected in starch and sugar and tricarboxylic acid (TCA) metabolism appears to be drug resistance-specific prior to growth normalization, this effect disappears upon growth normalization. The comparison of non-normalized and growth-normalized results in Figure 2 emphasizes that observed changes in metabolite concentrations are not necessarily indicative of cellular changes in flux. It further highlights that flux results must be growth normalized in order to distinguish a resistance model effect from a growth effect when comparing the metabolic profiles of resistant and sensitive cells. Changes in the pentose phosphate pathway (PPP), oxidative phosphorylation, glycolysis/gluconeogenesis, TCA, nucleotide, ROS and fatty acid pathways, for example, appear to be a direct result of acquired resistance when comparing OxR and RuR to their parental sensitive counterparts (Figure 2).

### Metallo drug resistance is linked to changes in energy metabolism

Integrating metabolite measurements into GSMs allows for growth rate normalization of the calculated fluxes which in turn allows for a direct flux comparison between resistant and sensitive cells. The reprogramming of energy metabolism to support cell growth and proliferation is a major hallmark of cancer [1] and has previously been linked to the emergence of acquired drug resistance [3]. To further investigate the role of a reprogramming of energy metabolism upon acquired metallo drug resistance, we used the four instances of the HCT116 model (OxR, sensitive, RuR, sensitive-DMSO) to specifically assess differences in flux in pathways related to energy metabolism.

In the growth-conditions considered here, glucose acts as the primary carbon source (Figure S2). Glucose is catabolized to pyruvate, generating two ATP during glycolysis. Pyruvate can then be transported into the mitochondria and converted to acetyl-CoA which then enters the TCA cycle or, in what is known as the Warburg effect in cancer cells [66], pyruvate can be converted to lactate. Acetyl-CoA can also be generated from fatty acid oxidation and sometimes amino acid catabolism (see [67] for a review). Fluxes corresponding to these three well-established energy pathways of colorectal cells along with the oxygen consumption are shown for each cell type in Figure 3. While glutaminolysis is another common means by which cancer cells support the Warburg effect [68], we did not measure high glutamine uptake rates in the considered growth conditions. In fact, our determined glucose and glutamine uptake rates are in the same orders of magnitude as previously determined for HCT116 cell lines grown in fetal bovine serum [60].

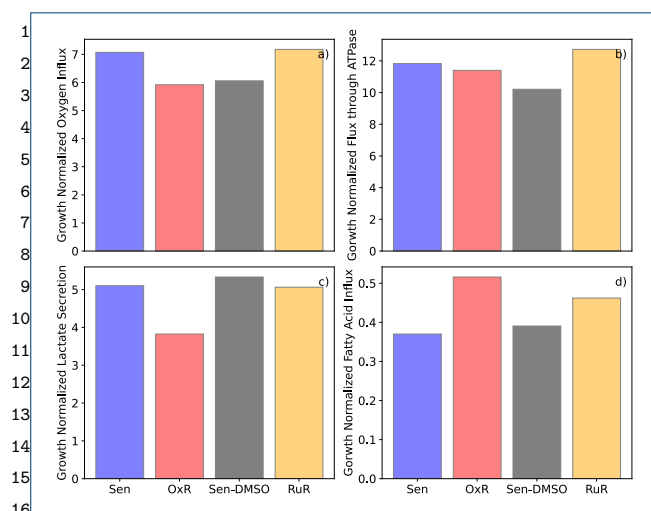

**Figure 3 Comparison of fluxes through key energy metabolism reactions for ruthenium- and oxaliplatin-based resistant cells after growth rate normalization.** Growth normalized flux values through (a) the oxygen uptake reaction - HMR\_9048, (b) the ATP synthase reaction - HMR\_6916, (c) the lactate secretion reaction - HMR\_9135, and (d) the fatty acid influx - sum of m01362s\_FAx, m02387s\_FAx, m02389s\_FAx, m02646s\_FAx, m02674s\_FAx, m02938s\_FAx, across the four model instances (sensitive - Sen - blue bars; sensitive in a DMSO-containing medium - Sen-DMSO - gray bars; oxaliplatin-resistant - OxR - red bars; BOLD-100/KP1339 - RuR - yellow bars) are shown. Fatty acid influx is the combined influx of stearate, palmitate, oleate, linolenate, linoleate, arachidonate.

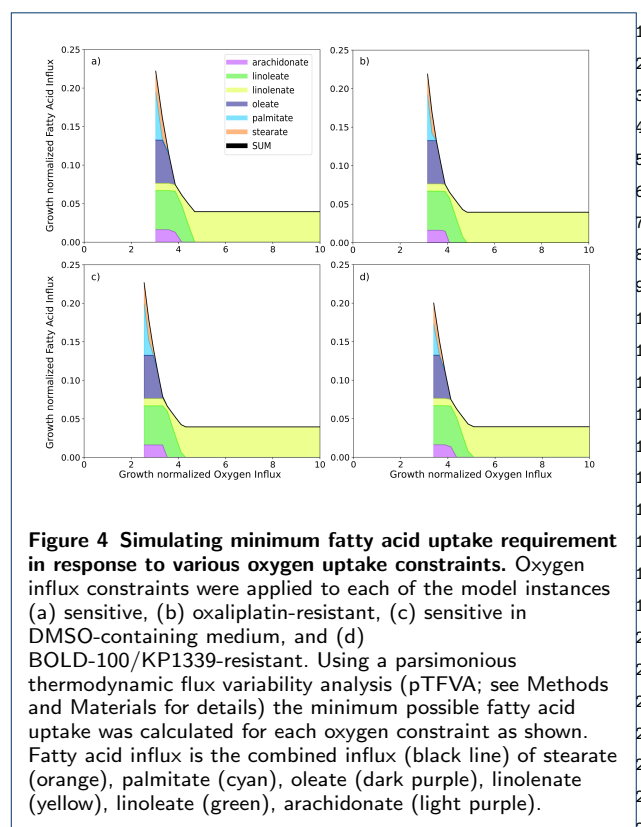

**Figure 4 Simulating minimum fatty acid uptake requirement in response to various oxygen uptake constraints.** Oxygen influx constraints were applied to each of the model instances (a) sensitive, (b) oxaliplatin-resistant, (c) sensitive in DMSO-containing medium, and (d) BOLD-100/KP1339-resistant. Using a parsimonious thermodynamic flux variability analysis (pTFVA; see Methods and Materials for details) the minimum possible fatty acid uptake was calculated for each oxygen constraint as shown. Fatty acid influx is the combined influx (black line) of stearate (orange), palmitate (cyan), oleate (dark purple), linolenate (yellow), linoleate (green), arachidonate (light purple).

We observe that OxR cells convert less pyruvate into lactate, but in turn consume a higher relative amount of fatty acids compared to their parental sensitive cells. RuR cells, however, show a high glycolytic flux and a high oxygen consumption as well as higher fatty acid consumption than their sensitive counterparts (Figure 3). Notably, the flux values shown in Figure 3 are growth normalized and may therefore not directly correspond to what would be observed in a traditional oxygen consumption rate (OCR) versus extracellular acidification rate (ECAR) experiment [69]. When comparing experimentally determined OCR and ECAR measurements to the non-normalized model results, we find a close agreement with regards to the differences in glycolysis and respiration between sensitive and resistant cells (Figure S4, S6); thus further validating the set model constraints.

With the four instances of the HCT116-specific GSMs, further conditions encountered in the tumor environment can be simulated. Simulating the effect of hypoxic growth conditions, we first set the oxygen influx for each model instance to the minimum possible value and then observe the minimum required fatty acid influx as we iteratively increase the oxygen influx, thus plotting the growth normalized production

envelope of oxygen versus minimum fatty acid influx for each of the four conditions (Figure 4). While RuR cells appear to have a lower tolerance for hypoxic conditions, they also have a higher fatty acid requirement under those conditions when compared to the sensitive simulations (Figure 4c,d). While the same differences can be observed between OxR and sensitive simulations, it is less pronounced (Figure 4a,b).

We then set a minimum possible fatty acid influx and iteratively increased the total fatty acid influx to the model while calculating the minimum required oxygen influx (Figure 4). We repeated this calculation for various biomass constraints and note that there is an optimal fatty acid influx for minimizing the total oxygen required. In fact, this optimal value corresponds directly to the fatty acid uptake rates observed in Figure 3d and is in accordance with the parsimonious thermodynamic flux variability analysis which minimizes the total sum of fluxes (see Method and Materials for details).

Crucially, while a direct comparison between resistant and sensitive cells for each drug respectively can be made, we cannot make a direct comparison between the two drug resistance models (Figure 1-5). Because RuR cells were grown in a DMSO-containing medium whereas OxR cells were not, we cannot, at this stage,



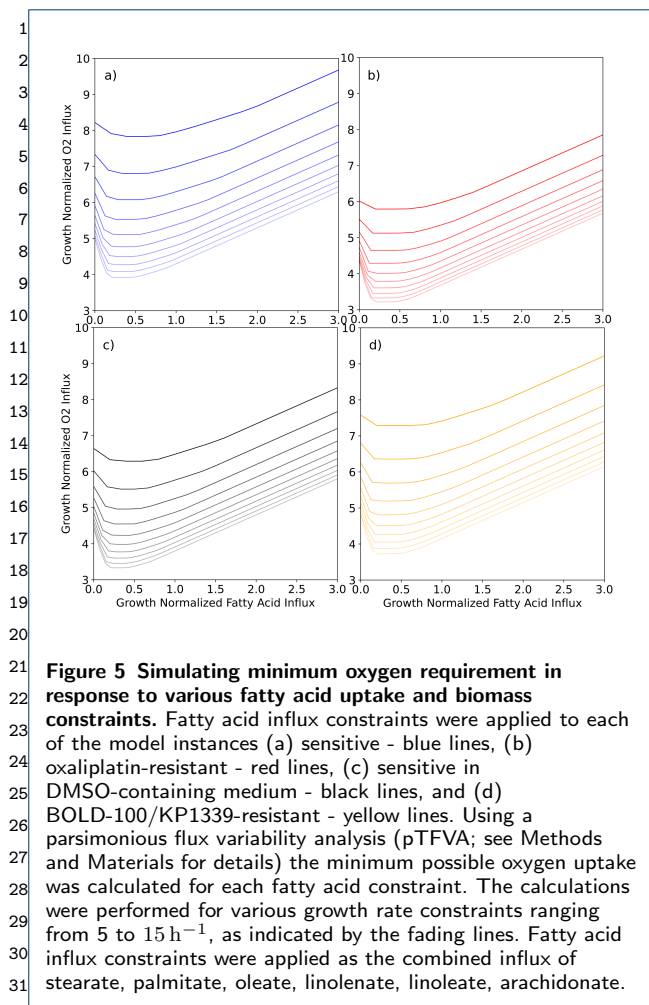

**Figure 5** Simulating minimum oxygen requirement in response to various fatty acid uptake and biomass constraints. Fatty acid influx constraints were applied to each of the model instances (a) sensitive - blue lines, (b) oxaliplatin-resistant - red lines, (c) sensitive in DMSO-containing medium - black lines, and (d) BOLD-100/KP1339-resistant - yellow lines. Using a parsimonious flux variability analysis (pTFVA; see Methods and Materials for details) the minimum possible oxygen uptake was calculated for each fatty acid constraint. The calculations were performed for various growth rate constraints ranging from 5 to 15 h<sup>-1</sup>, as indicated by the fading lines. Fatty acid influx constraints were applied as the combined influx of stearate, palmitate, oleate, linolenate, linoleate, arachidonate.

sensitive and resistant cells are the result of differences<sup>1</sup> caused by DMSO. As such, this normalization step al-<sup>2</sup>lows us to directly compare the two acquired resis-<sup>3</sup>tances, OxR and RuR, to one another even though<sup>4</sup> RuR, unlike OxR, was grown in a medium with low<sup>5</sup> solvent (DMSO) background. The comparison of OxR<sup>6</sup> and RuR (Figure 6) cells highlights an upregulation<sup>7</sup> of fluxes associated with amino acid and fatty acid<sup>8</sup> metabolism in RuR. OxR cells, on the other hand,<sup>9</sup> show an upregulation in glycolysis and starch and<sup>10</sup> sugar metabolism when compared to RuR cells (Fig-<sup>11</sup>ure 6b).<sup>12</sup>

Notably, when comparing the OxR and RuR model<sup>13</sup> instances to their respective parental HCT116 drug-<sup>14</sup>sensitive counterparts, prior to growth normalization,<sup>15</sup> we identified 1039 (OxR) and 1180 (RuR) fluxes<sup>16</sup> that were significantly different. Upon growth nor-<sup>17</sup>malization, these numbers reduced to 743 (OxR) and<sup>18</sup> 883 (RuR), highlighting that hundreds of differences<sup>19</sup> observed in the non-normalized results are simply<sup>20</sup> the result of a difference in growth rate. The OxR<sup>21</sup> versus RuR comparison upon growth-media DMSO-<sup>22</sup>background normalization highlighted 670 different re-<sup>23</sup>actions, suggesting that another 73 of reactions were<sup>24</sup> initially observed as significantly different because of<sup>25</sup> presence of 0.5% DMSO.<sup>26</sup>

## Discussion

Genome-scale metabolic models (GSMMs) provide<sup>29</sup> a platform for integrating omics data sets and for<sup>30</sup> analysing them in the context of metabolic fluxes.<sup>31</sup> As we have shown, GSMMs can be constrained using<sup>32</sup> both extracellular and intracellular metabolite con-<sup>33</sup>centrations to study metalloid drug resistance in colon<sup>34</sup>cancer. Approximately one-hundred metabolite con-<sup>35</sup>straints were applied to study the effect of changes<sup>36</sup> in their concentrations in thousands of reactions.<sup>37</sup> Colorectal-specific GSMMs have previously been con-<sup>38</sup>structed [47, 57, 70, 11] but have not yet been applied<sup>39</sup> to study metallo-drug resistance specifically. Here, we<sup>40</sup> compared metabolic flux alterations in HCT116 cell<sup>41</sup> models with acquired oxaliplatin- (OxR) vs BOLD-<sup>42</sup>100/KP1339 resistance (RuR) relative to parental,<sup>43</sup> drug-sensitive HCT116 cells grown in the respective<sup>44</sup> growth media without or with 0.5% DMSO.<sup>45</sup>

In this study, we investigated various pathways in<sup>46</sup> silico including glycolysis, the tricarboxylic acid cycle,<sup>47</sup> fatty acid and amino acid metabolism, beta-oxidation,<sup>48</sup> the pentose phosphate pathway. A comprehensive sta-<sup>49</sup>ble isotope resolved metabolic flux analysis consider-<sup>50</sup>ing such a diverse set of pathways would require the<sup>51</sup> application of multiple different positionally labelled<sup>52</sup> isotopic tracers [71, 26]. In addition to economic fac-<sup>53</sup>tors, practical challenges may also play a role in exper-<sup>54</sup>imental design. The application of palmitate to study<sup>55</sup>

distinguish a resistance model-specific effect from a sol-<sup>34</sup>vent background-induced effect.<sup>35</sup>

Growth rate and medium normalization allows for a<sup>37</sup> direct comparison of fluxes of cells grown across<sup>38</sup> heterogeneous conditions<sup>39</sup>

In order to be able to compare the metabolic profiles<sup>41</sup> of the two metalloid drug resistance phenotypes directly,<sup>42</sup> we finally normalized the flux results obtained from the<sup>43</sup> metallo-resistant model instances against their respec-<sup>44</sup>tive parental sensitive counterparts (see Materials and<sup>45</sup> Methods for further details). By dividing growth rate<sup>46</sup> normalized and feature-scaled flux values calculated<sup>47</sup> for the resistant models by those calculated for the re-<sup>48</sup>spective sensitive models, we add a further normaliza-<sup>49</sup>tion step. This normalization step eliminates observed<sup>50</sup> differences in flux values that are the result of differ-<sup>51</sup>ences due to the presence of DMSO-background. Be-<sup>52</sup>cause the parental sensitive counterparts were grown<sup>53</sup> in the same medium as their resistant counterparts,<sup>54</sup> we can assume that shared differences in flux between<sup>55</sup>

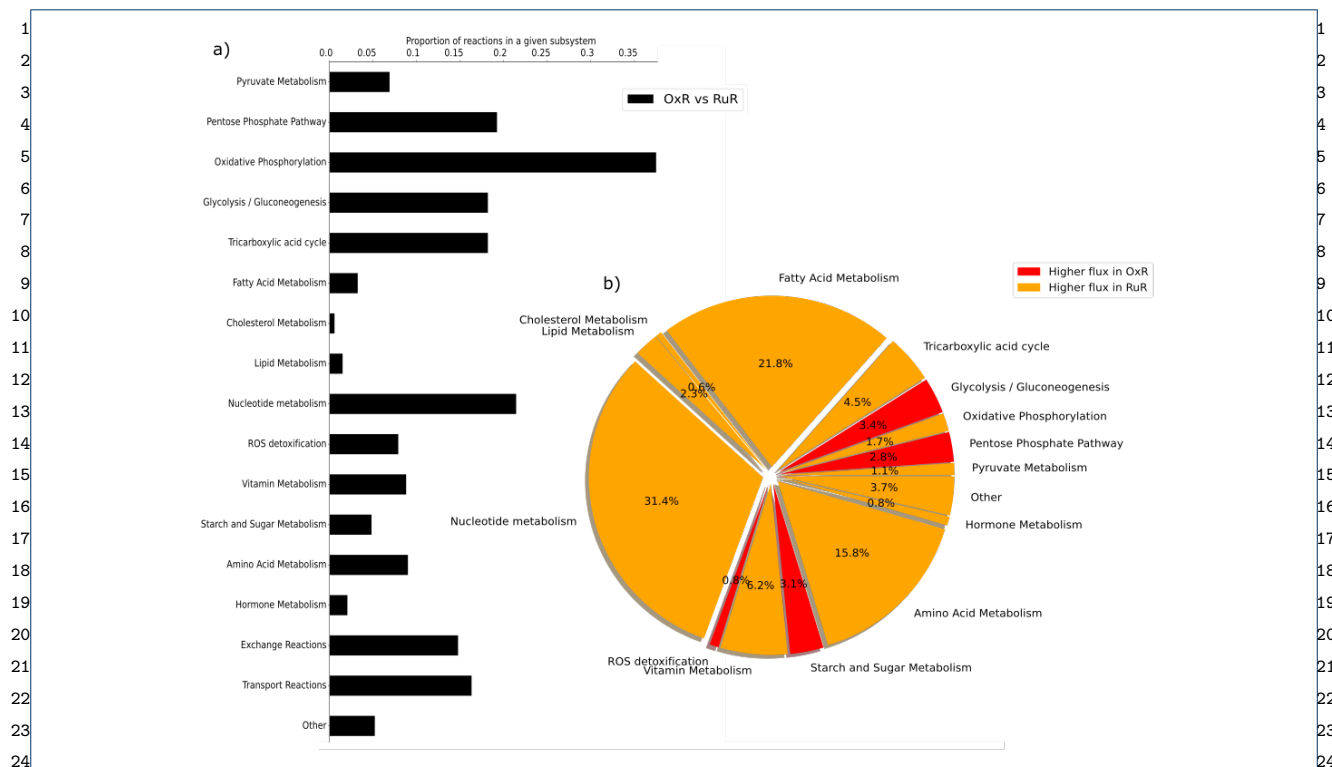

**Figure 6 Predicted differences in the metabolic fluxes of ruthenium- and oxaliplatin-based resistances after growth rate and medium normalization.** Both intracellular and extracellular metabolite constraints were applied to generate four instances of the HCT-specific GSMMs (oxaliplatin (OxR) and BOLD-100/KP1339 (RuR) and their sensitive parental counterparts (WT and WT-DMSO, respectively)) as described in the Materials and Methods. A parsimonious thermodynamic flux variability analysis (pTFVA) was done on each model instance. Each set of flux values was divided by the corresponding flux through biomass (Figure S1), thus normalizing for differences in growth. Flux values were then feature-scaled to lie between 0 and 1 and the flux values obtained in the drug-resistant instances were divided by the flux values of the corresponding control instances, thus normalizing for difference in medium composition. (a) The relative changes in flux between OxR and RuR instances were calculated and the total number of reactions that showed an absolute relative difference greater than 15% in relative upper and lower flux values were counted for each subsystem. The proportion of reactions that are significantly different in each subsystem is shown as black bars. Subsystems for which no relative changes in flux between the two resistant instances were observed were omitted from the figure for clarity. (b) Percentage of reactions in a subsystem which were identified as significantly different out of all reactions that were identified as significantly different between the two conditions are shown as a pie chart. Subsystems for which the total flux values were higher in OxR are shown in red. Subsystems for which total flux values were higher in the RuR are shown in orange. The subsystems transport reactions were omitted from this analysis as together they make up over 95% of the significantly different reactions.

beta-oxidation, for example, requires the conjugation of fatty acid free bovine serum albumin [72]. Moreover, it usually has high background contamination from plastic materials [73]. Finally, stable isotope labeling in living organisms is even more complex from a data evaluation perspective [74]. Thus, a purely experimental study that provides a holistic analysis of metabolic reprogramming in cancer is currently infeasible.

There is no simple relationship between changes in metabolite concentrations and changes in flux [75]. This notion also applies to acquired resistance in the HCT116 colorectal cancer cell line. We have shown that observed differences in metabolite concentrations between resistant and sensitive conditions may not necessarily reflect a drug resistance-specific response but may instead arise as a result of differences in

growth rate or solvent conditions. If we want to compare changes in metabolic flux of cells grown in heterogeneous conditions, data needs to be normalized in order for valid comparisons to be made. Here we have outlined a procedure for this kind of normalization based on thermodynamic genome-scale metabolic modelling of the HCT116 cell line.

Accurate comparative profiling of metabolic changes observed across heterogeneous conditions remains a challenge. Differences in growth rates and impact of solvent necessities will result in observed differences in metabolite concentrations but are not causal to a reprogramming of metabolism [76]. Considering cellular fluxes as the metabolic phenotype through the use of GSMMs has the advantage that fluxes, unlike concentrations, can easily be normalized with regards to

<sup>1</sup> other rate measurements, such as growth rate or ex-  
<sup>2</sup> change rates (e.g. [77, 78, 79]).

<sup>3</sup> As a prerequisite to produce accurate, quantitative  
<sup>4</sup> metabolomics data [76], we normalized the metabo-  
<sup>5</sup> lite amounts to total protein content, calculating ab-  
<sup>6</sup> solute concentrations based on internal standardiza-  
<sup>7</sup> tion. Even though this approach is superior to relative  
<sup>8</sup> quantification and is able to compensate for technical  
<sup>9</sup> variation of the sample preparation and differences in  
<sup>10</sup> extracted biomass, it does not account for biological  
<sup>11</sup> processes like growth or environmental factors such as  
<sup>12</sup> differences in medium composition.

<sup>13</sup> Integrating the metabolite data as part of a thermo-  
<sup>14</sup> dynamic flux analysis allows us to normalize the calcu-  
<sup>15</sup> lated reaction rates by the growth rate observed under  
<sup>16</sup> the corresponding conditions. We showed that growth-  
<sup>17</sup> normalization reduces the number of reactions that  
<sup>18</sup> are different between resistant and sensitive model in-  
<sup>19</sup> stances and changes some of the conclusions about  
<sup>20</sup> altered metabolic pathways entirely. Growth normal-  
<sup>21</sup> ization is therefore a critical step when looking for  
<sup>22</sup> drug-specific metabolic phenotypes. A second limita-  
<sup>23</sup> tion to studying non-normalized metabolite concentra-  
<sup>24</sup> tions is that data obtained from heterogeneous condi-  
<sup>25</sup> tions cannot be directly compared. Using the growth  
<sup>26</sup> normalized flux results we further normalized each re-  
<sup>27</sup> sistant model against its sensitive counterpart which  
<sup>28</sup> was grown in an identical medium and solvent com-  
<sup>29</sup> position. Hence, we were able to do a direct compar-  
<sup>30</sup> ison between the two metallo-resistances and to identify  
<sup>31</sup> drug resistance-specific responses.

<sup>32</sup> A limitation to our approach is that we first nor-  
<sup>33</sup> malized our flux results to differences in growth rate  
<sup>34</sup> and then normalized each resistant model against its  
<sup>35</sup> respective counterpart. This means that we are unable  
<sup>36</sup> to capture emergent properties that result from differ-  
<sup>37</sup> ences in growth rate and solvent impact; we assume  
<sup>38</sup> that a combined effect of the two is minimal. Further-  
<sup>39</sup> more our flux analyses assume metabolism to be in  
<sup>40</sup> steady-state, such that intracellular concentrations are  
<sup>41</sup> constant. Nonetheless, we have clearly demonstrated  
<sup>42</sup> that a growth and medium/solvent normalization is  
<sup>43</sup> non-trivial as it allows for comparisons across het-  
<sup>44</sup> erogeneous conditions. We expect this method to be  
<sup>45</sup> of wider applicability in studies where the effects of  
<sup>46</sup> medium compositions, such as the availability of car-  
<sup>47</sup> bon sources to a cell, are of interest.

<sup>48</sup> Time-dependent changes of metabolite profiles have  
<sup>49</sup> previously been considered [80, 81], but are not typ-  
<sup>50</sup> ically integrated at a genome-scale level. Measuring  
<sup>51</sup> metabolite concentrations alongside cell counts at vari-  
<sup>52</sup> ous time points and quantifying the relative metabolite  
<sup>53</sup> abundance per cell using linear regression Dubuis *et*  
<sup>54</sup> al. [80] accounts for deviations from steady-state. The  
<sup>55</sup>

method was then further developed, using intermedi-  
ates of fatty acid metabolism and other metabolites to  
account for differences in cell size [81]. While the differ-  
ence in cell size can be interpreted as a proxy of growth  
rate it cannot be assumed that the observed changes  
in metabolite concentrations directly translate to dif-  
ferences in metabolic activity, i.e. fluxes. Metabolic re-  
sponses associated with an acquired metalloidrug re-  
sistance in cancer have not yet been studied exten-  
sively using constraint-based flux analyses [82, 83, 38].  
The use of GSMMs to integrate metabolomics data to  
study cellular fluxes, however, provides multiple new  
opportunities in this field.

Defense mechanisms and acquired resistance are well  
known phenomena when applying metal-based drugs,  
as anticancer agents. Reduced efficacy due to acquired  
resistance remains a major challenge in systemic anti-  
cancer therapy. The complexity is increasingly recog-  
nized, as the contribution of epigenetic and metabolic  
effects will be uncovered. Drug-specific and tumor  
tissue specific mechanisms have been described, and  
more recently the tumor microenvironment has come  
into focus [84]. Accordingly, response profiling with  
metabolomics analysis can be a powerful tool to inves-  
tigate drugs and drug candidates [28, 27] and dissect  
emerging resistance [85]. Currently, only a hand-  
ful of studies consider metalloidrugs applied to cancers  
with metabolomics [86, 87, 88], and even fewer inves-  
tigate acquired metalloidrug resistance [52].

In this work, we consider an *in vitro* study of colon  
cancer. Gastrointestinal cancer cell lines, including col-  
orectal cancer cell line HCT116 activate beta-oxidation  
as response to oxaliplatin treatment and conversely be-  
come more sensitive to oxaliplatin upon inhibition of  
fatty acid catabolism [22]. A seminal study in the field  
integrates both metabolomics and transcriptomics and  
finds that, within 59 NCI60 cell lines, the metabolic ba-  
sis of platinum-sensitivity can largely be attributed to  
energy metabolism (TCA cycle, glutaminolysis, pyru-  
vate metabolism), lipoprotein uptake, and nucleotide  
synthesis [89]. The results from our *in silico* analysis  
are in line with these findings, also highlighting the im-  
portance of energy metabolism (OXPHOS, glycolysis,  
TCA).

Figure 6 highlights the relevance of fatty acid  
metabolism, as fluxes from this subsystem contribute  
to 12.5% of all observed differences (excluding all  
transport reactions) between the RuR and OxR, show-  
ing elevated fluxes in RuR. This supports existing  
evidence of beta-oxidation activation in response to  
metalloidrug treatment [22]. Interestingly, for the ma-  
jority of observed flux differences between OxR and  
RuR, flux values are higher in the RuR, implying

<sup>1</sup>a higher metabolic activity in this phenotype, inde-  
<sup>2</sup>pendently of differences in growth rate. OxR, how-  
<sup>3</sup>ever, does exhibit elevated activity in the Glycoly-  
<sup>4</sup>sis/Glyconeogenesis and pentose phosphate pathways.  
<sup>5</sup>Thus, our comparison of the growth rate- and medium-  
<sup>6</sup>normalized reaction rates supports the notion that an  
<sup>7</sup>acquired resistance to the two metallodrugs is marked  
<sup>8</sup>by differences in their metabolic phenotype with an  
<sup>9</sup>overall higher metabolic activity in the RuR system.

<sup>10</sup>The high metabolic plasticity of cancer cells enables  
<sup>11</sup>efficient detoxification and protection strategies [84].  
<sup>12</sup>Normalization of the flux values by growth rate sub-  
<sup>13</sup>stantially reduces the observed differences (Figure 2) in  
<sup>14</sup>most of the investigated pathways. In contrast, both  
<sup>15</sup>the pentose phosphate pathway and ROS detoxifica-  
<sup>16</sup>tion subsystem, which includes glutathione-synthesis,  
<sup>17</sup>were emphasized to the same extent in both the OxR  
<sup>18</sup>and RuR resistance models upon growth standardiza-  
<sup>19</sup>tion. This supports the notion that metallodrugs in-  
<sup>20</sup>terfere with cellular redox homeostasis and stimulate  
<sup>21</sup>a readiness to counter reactive oxygen species (also by  
<sup>22</sup>synthesizing NADPH via the pentose phosphate path-  
<sup>23</sup>way) which has previously been described to conjugate  
<sup>24</sup>glutathione to platinum complexes with glutathione-S-  
<sup>25</sup>transferase [90].

<sup>26</sup>Despite shared commonalities like the production of  
<sup>27</sup>ROS, it is expected that RuR and OxR models dis-  
<sup>28</sup>play different metabolic phenotypes, because of known  
<sup>29</sup>differences in their modes of action [91, 92, 25]. Oxali-  
<sup>30</sup>platin, for example, is primarily a DNA targeting drug,  
<sup>31</sup>whereas BOLD-100/KP1339 has recently been found  
<sup>32</sup>to have a prodrug nature and is capable of causing ER-  
<sup>33</sup>stress and the downregulation of GRP78, encoding a  
<sup>34</sup>endoplasmic reticulum chaperone protein, which has  
<sup>35</sup>been linked to malignancy [93]. It is widely accepted  
<sup>36</sup>that DNA repair mechanisms play a crucial role in re-  
<sup>37</sup>sistance to oxaliplatin [94]. It is important to note that,  
<sup>38</sup>using GSMM, we have here focused solely on metabolic  
<sup>39</sup>changes to compare metabolic reprogramming of the  
<sup>40</sup>two acquired resistances but cannot exclude further  
<sup>41</sup>regulatory events.

<sup>42</sup>The comparison of fluxes through key energy me-  
<sup>43</sup>tabolism reactions (Figure 3) shows that both acquired  
<sup>44</sup>resistances are defined by lowered glycolytic flux than  
<sup>45</sup>their sensitive parental cells, although this is less pro-  
<sup>46</sup>nounced with RuR. Growth normalization does not af-  
<sup>47</sup>fect this observation (Figure S4). The same cannot be  
<sup>48</sup>said about the fatty acid beta-oxidation, where upon  
<sup>49</sup>growth standardization the acquired resistance models  
<sup>50</sup>both show a higher fatty acid requirement than their  
<sup>51</sup>sensitive controls (Figure 3d; Figure S4d). Addition-  
<sup>52</sup>ally, upon growth normalization OxR has lower and  
<sup>53</sup>RuR higher respiration rates than corresponding sensi-  
<sup>54</sup>tive counterparts (Figure 3a). The calculated rates cor-  
<sup>55</sup>respond well to the experimentally determined results

with a Seahorse assay (Figure S6). As expected the ex-  
perimentally determined and non-normalized *in vitro*  
results align more closely with the non-normalized flux  
values modelled *in silico*.

Drastic changes in oxygen and fatty acid availability  
are known stress conditions in a tumor microenviron-  
ment, and are assumed to be managed with metabolic  
adaptations [4]. Lipid dependency, for example, is  
more pronounced under hypoxic conditions and relies  
on the uptake of extracellular fatty acids [95, 96, 72].  
We thus used the condition-specific instances of our  
constrained GSMM to further inspect the relationship  
between hypoxia and fatty acid uptake. We found that  
the composition of fatty acids taken up changes in  
response to oxygen limitation (Figure 4). Under nor-  
moxic conditions linolenate can act as the sole fatty  
acid source. As oxygen limitation becomes more pro-  
nounced, linoleate, arachidonate, oleate, stearate and  
finally palmitate are also required. RuR cells requires  
less fatty acids under oxygen limitation compared to  
its sensitive counterpart (Figure 4c,d); while the same  
is true for OxR the observed difference is notably less  
pronounced (Figure 4a,b).

Additionally, the investigation of minimum oxygen  
requirement at various fatty acid influxes (Figure 5) re-  
vealed that the optimal fatty acid composition, which  
has the lowest oxygen demand, is the same across  
growth rates. Overall, OxR has the lowest oxygen re-  
quirement, which suggests that if sufficient fatty acids  
are available, OxR will be the most resilient of the  
investigated model against hypoxia (Figure 5).

## Conclusion

There are different ways to capture the metabolic phe-  
notype of a cell. Metabolic profiling via metabolomics  
provides an interrogation window of the intracellular  
concentrations at a given point in time. Extracellu-  
lar concentrations measured over time provide insight  
to the cellular uptake and excretion rates of cells. To-  
gether they can be integrated to constrain the solution  
space of a genome-scale metabolic model. The calcu-  
lated flux values can then be normalized according to  
growth rates and environmental conditions, allowing  
for drug resistance specific metabolic responses to be  
identified across heterogenous conditions. We find the  
outlined normalization steps to be crucial in the in-  
terpretation of the results and show that metabolic re-  
programming is more extensive in BOLD-100/KP1339  
resistant cells than in oxaliplatin resistant cells. We  
identify pathways, such as fatty acid and amino acid  
metabolism, to be upregulated in response to a resis-  
tance acquired to a ruthenium-based drug when com-  
pared to a platinum-based drug. All in all, genome-  
scale metabolic modelling provides a valuable platform

<sup>1</sup>for putting observed changes in metabolite concentra-  
<sup>2</sup>tions in the context of metabolic fluxes.  
<sup>3</sup>

<sup>4</sup>**Availability of data and materials**

<sup>5</sup>All data and code used to conduct the analyses presented in this  
<sup>6</sup>manuscript are available on GitHub  
<sup>7</sup>([https://github.com/HAHerrmann/Hct116\\_DrugRes](https://github.com/HAHerrmann/Hct116_DrugRes)) and Zenodo (DOI:  
<sup>8</sup>[10.5281/zenodo.4633725](https://doi.org/10.5281/zenodo.4633725)). Metabolomics data (LC high-resolution mass  
<sup>9</sup>spectrometry-based metabolomics dataset in rawdata and total protein  
<sup>10</sup>contents corresponding to the samples) have been deposited to the  
<sup>11</sup>EMBL-EBI MetaboLights database [97] with the identifier MTBLS2665 for  
<sup>12</sup>the OxR-batch and MTBLS2681 for the RuR-batch. The complete dataset  
<sup>13</sup>can be accessed at <https://www.ebi.ac.uk/metabolights/MTBLS2665>  
<sup>14</sup>and <https://www.ebi.ac.uk/metabolights/MTBLS2681> for the OxR- and  
<sup>15</sup>RuR-batch, respectively.

<sup>16</sup>**Competing interests**

<sup>17</sup>The authors declare that they have no competing interests.

<sup>18</sup>**Author's contributions**

| Author contributions       | HAH <sup>†</sup> | MR <sup>‡</sup> | DB | MAJ | BKK | WB | GK | JZ |
|----------------------------|------------------|-----------------|----|-----|-----|----|----|----|
| Conceptualization          |                  |                 |    |     |     |    |    |    |
| Funding acquisition        |                  |                 |    |     |     |    |    |    |
| Methodology                |                  |                 |    |     |     |    |    |    |
| Software                   |                  |                 |    |     |     |    |    |    |
| Formal analysis            |                  |                 |    |     |     |    |    |    |
| Investigation              |                  |                 |    |     |     |    |    |    |
| Resources                  |                  |                 |    |     |     |    |    |    |
| Validation                 |                  |                 |    |     |     |    |    |    |
| Supervision                |                  |                 |    |     |     |    |    |    |
| Visualization              |                  |                 |    |     |     |    |    |    |
| Writing – original draft   |                  |                 |    |     |     |    |    |    |
| Writing – review & editing |                  |                 |    |     |     |    |    |    |

<sup>24</sup>**Author details**

<sup>25</sup><sup>1</sup>Department of Analytical Chemistry, University of Vienna, Vienna,  
<sup>26</sup>Austria. <sup>2</sup>Institute of Inorganic Chemistry, University of Vienna, Vienna,  
<sup>27</sup>Austria. <sup>3</sup>Research Cluster Translational Cancer Therapy Research,  
<sup>28</sup>University of Vienna and Medical University of Vienna, Vienna, Austria.  
<sup>29</sup><sup>4</sup>Institute of Cancer Research and Comprehensive Cancer Center, Medical  
<sup>30</sup>University of Vienna, Vienna, Austria. <sup>5</sup>Vienna Metabolomics Center  
<sup>31</sup>(VIME), University of Vienna, Vienna, Austria. <sup>6</sup>Research Network  
<sup>32</sup>Chemistry Meets Microbiology, University of Vienna, Vienna, Austria.

<sup>31</sup>**References**

<sup>32</sup>1. Hanahan, D., Weinberg, R.A.: Hallmarks of Cancer: The Next  
<sup>33</sup>Generation. *Cell* **144**(5), 646–674 (2011). doi:[10.1016/j.cell.2011.02.013](https://doi.org/10.1016/j.cell.2011.02.013)  
<sup>34</sup>2. Vernieri, C., Casola, S., Foiani, M., Pietrantonio, F., Braud, F.d.,  
<sup>35</sup>Longo, V.: Targeting Cancer Metabolism: Dietary and Pharmacologic  
<sup>36</sup>Interventions. *Cancer Discovery* **6**(12), 1315–1333 (2016).  
<sup>37</sup>doi:[10.1158/2159-8290.CD-16-0615](https://doi.org/10.1158/2159-8290.CD-16-0615)  
<sup>38</sup>3. Zaal, E.A., Berkers, C.R.: The Influence of Metabolism on Drug  
<sup>39</sup>Response in Cancer. *Frontiers in Oncology* **8** (2018).  
<sup>40</sup>doi:[10.3389/fonc.2018.00500](https://doi.org/10.3389/fonc.2018.00500)  
<sup>41</sup>4. Faubert, B., Solmonson, A., DeBerardinis, R.J.: Metabolic  
<sup>42</sup>reprogramming and cancer progression. *Science* **368**(6487) (2020).  
<sup>43</sup>doi:[10.1126/science.aaw5473](https://doi.org/10.1126/science.aaw5473)  
<sup>44</sup>5. Agren, R., Bordel, S., Mardinoglu, A., Pornputtapong, N., Nookaew,  
<sup>45</sup>I., Nielsen, J.: Reconstruction of Genome-Scale Active Metabolic  
<sup>46</sup>Networks for 69 Human Cell Types and 16 Cancer Types Using INIT.  
<sup>47</sup>*PLoS Computational Biology* **8**(5), 1002518 (2012).  
<sup>48</sup>doi:[10.1371/journal.pcbi.1002518](https://doi.org/10.1371/journal.pcbi.1002518)  
<sup>49</sup>6. Nilsson, A., Nielsen, J.: Genome scale metabolic modeling of cancer.  
<sup>50</sup>*Metabolic Engineering* **43**, 103–112 (2017).  
<sup>51</sup>doi:[10.1016/j.ymben.2016.10.022](https://doi.org/10.1016/j.ymben.2016.10.022)  
<sup>52</sup>7. Folger, O., Jerby, L., Frezza, C., Gottlieb, E., Ruppin, E., Shlomi, T.:  
<sup>53</sup>Predicting selective drug targets in cancer through metabolic networks.  
<sup>54</sup>*Molecular Systems Biology* **7**(1), 501 (2011). doi:[10.1038/msb.2011.35](https://doi.org/10.1038/msb.2011.35)  
<sup>55</sup>8. Frezza, C., Zheng, L., Folger, O., Rajagopalan, K.N., MacKenzie, E.D.,  
<sup>56</sup>Jerby, L., Micaroni, M., Chanton, B., Adam, J., Hedley, A., Kalna, G.,  
<sup>57</sup>Tomlinson, I.P.M., Pollard, P.J., Watson, D.G., Deberardinis, R.J.,  
<sup>58</sup>Shlomi, T., Ruppin, E., Gottlieb, E.: Haem oxygenase is synthetically  
<sup>59</sup>lethal with the tumour suppressor fumarate hydratase. *Nature*  
<sup>60</sup>**477**(7363), 225–228 (2011). doi:[10.1038/nature10363](https://doi.org/10.1038/nature10363)

<sup>61</sup>9. Gatto, F., Miess, H., Schulze, A., Nielsen, J.: Flux balance analysis  
<sup>62</sup>predicts essential genes in clear cell renal cell carcinoma metabolism.  
<sup>63</sup>*Scientific Reports* **5**(1), 10738 (2015). doi:[10.1038/srep10738](https://doi.org/10.1038/srep10738)  
<sup>64</sup>10. Jerby, L., Ruppin, E.: Predicting Drug Targets and Biomarkers of  
<sup>65</sup>Cancer via Genome-Scale Metabolic Modeling. *Clinical Cancer*  
<sup>66</sup>*Research* **18**(20), 5572–5584 (2012).  
<sup>67</sup>doi:[10.1158/1078-0432.CCR-12-1856](https://doi.org/10.1158/1078-0432.CCR-12-1856)  
<sup>68</sup>11. Zhang, C., Aldrees, M., Arif, M., Li, X., Mardinoglu, A., Aziz, M.A.:  
<sup>69</sup>Elucidating the Reprogramming of Colorectal Cancer Metabolism Using  
<sup>70</sup>Genome-Scale Metabolic Modeling. *Frontiers in Oncology* **9** (2019).  
<sup>71</sup>doi:[10.3389/fonc.2019.00681](https://doi.org/10.3389/fonc.2019.00681)  
<sup>72</sup>12. Dallas, N.A., Xia, L., Fan, F., Gray, M.J., Gaur, P., Buren, G.v.,  
<sup>73</sup>Samuel, S., Kim, M.P., Lim, S.J., Ellis, L.M.: Chemoresistant  
<sup>74</sup>Colorectal Cancer Cells, the Cancer Stem Cell Phenotype, and  
<sup>75</sup>Increased Sensitivity to Insulin-like Growth Factor-I Receptor  
<sup>76</sup>Inhibition. *Cancer Research* **69**(5), 1951–1957 (2009).  
<sup>77</sup>doi:[10.1158/0008-5472.CAN-08-2023](https://doi.org/10.1158/0008-5472.CAN-08-2023)  
<sup>78</sup>13. Hu, T., Li, Z., Gao, C.-Y., Cho, C.H.: Mechanisms of drug resistance  
<sup>79</sup>in colon cancer and its therapeutic strategies. *World Journal of*  
<sup>80</sup>*Gastroenterology* **22**(30), 6876–6889 (2016).  
<sup>81</sup>doi:[10.3748/wjg.v22.i30.6876](https://doi.org/10.3748/wjg.v22.i30.6876)  
<sup>82</sup>14. Stein, A., Atanackovic, D., Bokemeyer, C.: Current standards and new  
<sup>83</sup>trends in the primary treatment of colorectal cancer. *European Journal*  
<sup>84</sup>*of Cancer* **47**, 312–314 (2011). doi:[10.1016/S0959-8049\(11\)70183-6](https://doi.org/10.1016/S0959-8049(11)70183-6)  
<sup>85</sup>15. Vasan, N., Baselga, J., Hyman, D.M.: A view on drug resistance in  
<sup>86</sup>cancer. *Nature* **575**(7782), 299–309 (2019).  
<sup>87</sup>doi:[10.1038/s41586-019-1730-1](https://doi.org/10.1038/s41586-019-1730-1)  
<sup>88</sup>16. Gill, S., Thomas, R.R., Goldberg, R.M.: Colorectal cancer  
<sup>89</sup>chemotherapy. *Alimentary Pharmacology & Therapeutics* **18**(7),  
<sup>90</sup>683–692 (2003). doi:[10.1046/j.1365-2036.2003.01735.x](https://doi.org/10.1046/j.1365-2036.2003.01735.x)  
<sup>91</sup>17. Anthony, E.J., Bolitho, E.M., Bridgewater, H.E., Carter, O.W.L.,  
<sup>92</sup>Donnelly, J.M., Imberti, C., Lant, E.C., Lermite, F., Needham, R.J.,  
<sup>93</sup>Palau, M., Sadler, P.J., Shi, H., Wang, F.-X., Zhang, W.-Y., Zhang,  
<sup>94</sup>Z.: Metalloids are unique: opportunities and challenges of discovery  
<sup>95</sup>and development. *Chemical Science* **11**(48), 12888–12917 (2020).  
<sup>96</sup>doi:[10.1039/D0SC04082G](https://doi.org/10.1039/D0SC04082G)  
<sup>97</sup>18. Savvas, P., Efrosini, K., Athanasios, S.: Metalloids in Targeted  
<sup>98</sup>Cancer Therapeutics: Aiming at Chemoresistance- related Patterns and  
<sup>99</sup>Immunosuppressive Tumor Networks. *Current Medicinal Chemistry*  
<sup>100</sup>**26**(4), 607–623 (2019)  
<sup>101</sup>19. Sung, H., Ferlay, J., Siegel, R.L., Laversanne, M., Soerjomataram, I.,  
<sup>102</sup>Jemal, A., Bray, F.: Global cancer statistics 2020: GLOBOCAN  
<sup>103</sup>estimates of incidence and mortality worldwide for 36 cancers in 185  
<sup>104</sup>countries. *CA: A Cancer Journal for Clinicians* (2020).  
<sup>105</sup>doi:[10.3322/caac.21660](https://doi.org/10.3322/caac.21660)  
<sup>106</sup>20. Johnstone, T.C., Park, G.Y., Lippard, S.J.: Understanding and  
<sup>107</sup>Improving Platinum Anticancer Drugs – Phenanthriplatin. *Anticancer*  
<sup>108</sup>*research* **34**(1), 471–476 (2014)  
<sup>109</sup>21. Zhou, J., Kang, Y., Chen, L., Wang, H., Liu, J., Zeng, S., Yu, L.: The  
<sup>110</sup>Drug-Resistance Mechanisms of Five Platinum-Based Antitumor  
<sup>111</sup>Agents. *Frontiers in Pharmacology* **11** (2020).  
<sup>112</sup>doi:[10.3389/fphar.2020.00343](https://doi.org/10.3389/fphar.2020.00343)  
<sup>113</sup>22. Wang, Y., Lu, J.-H., Wang, F., Wang, Y.-N., He, M.-M., Wu, Q.-N.,  
<sup>114</sup>Lu, Y.-X., Yu, H.-E., Chen, Z.-H., Zhao, Q., Liu, J., Chen, Y.-X.,  
<sup>115</sup>Wang, D.-S., Sheng, H., Liu, Z.-X., Zeng, Z.-L., Xu, R.-H., Ju, H.-Q.:  
<sup>116</sup>Inhibition of fatty acid catabolism augments the efficacy of  
<sup>117</sup>oxaliplatin-based chemotherapy in gastrointestinal cancers. *Cancer*  
<sup>118</sup>*Letters* **473**, 74–89 (2020). doi:[10.1016/j.canlet.2019.12.036](https://doi.org/10.1016/j.canlet.2019.12.036)  
<sup>119</sup>23. Burris, H.A., Bakewell, S., Bendell, J.C., Infante, J., Jones, S.F.,  
<sup>120</sup>Spigel, D.R., Weiss, G.J., Ramanathan, R.K., Ogden, A., Hoff, D.V.:  
<sup>121</sup>Safety and activity of IT-139, a ruthenium-based compound, in  
<sup>122</sup>patients with advanced solid tumours: a first-in-human, open-label,  
<sup>123</sup>dose-escalation phase I study with expansion cohort. *ESMO Open* **1**(6)  
<sup>124</sup>(2016). doi:[10.1136/esmoopen-2016-000154](https://doi.org/10.1136/esmoopen-2016-000154)  
<sup>125</sup>24. Trondl, R., Heffeter, P., Kowol, C.R., Jakupec, M.A., Berger, W.,  
<sup>126</sup>Kepler, B.K.: NKP-1339, the first ruthenium-based anticancer drug  
<sup>127</sup>on the edge to clinical application. *Chemical Science* **5**(8), 2925–2932  
<sup>128</sup>(2014). doi:[10.1039/C3SC53243G](https://doi.org/10.1039/C3SC53243G)  
<sup>129</sup>25. Meier-Menches, S.M., Gerner, C., Berger, W., Hartinger, C.G.,  
<sup>130</sup>Kepler, B.K.: Structure–activity relationships for ruthenium and  
<sup>131</sup>osmium anticancer agents – towards clinical development. *Chemical*  
<sup>132</sup>*Science* (2020). doi:[10.1039/C9SC02433G](https://doi.org/10.1039/C9SC02433G)

- 1 Society Reviews **47**(3), 909–928 (2018). doi:[10.1039/C7CS00332C](https://doi.org/10.1039/C7CS00332C)
26. Jang, C., Chen, L., Rabinowitz, J.D.: Metabolomics and Isotope  
2 Tracing. *Cell* **173**(4), 822–837 (2018). doi:[10.1016/j.cell.2018.03.055](https://doi.org/10.1016/j.cell.2018.03.055)
- 3 27. Armitage, E.G., Godzien, J., Peña, I., López-González, Á., Angulo,  
4 S., Gradillas, A., Alonso-Herranz, V., Martín, J., Fiandor, J.M.,  
5 Barrett, M.P., Gabarro, R., Barbas, C.: Metabolic Clustering Analysis  
6 as a Strategy for Compound Selection in the Drug Discovery Pipeline  
7 for Leishmaniasis. *ACS Chemical Biology* **13**(5), 1361–1369 (2018).  
8 doi:[10.1021/acschembio.8b00204](https://doi.org/10.1021/acschembio.8b00204)
- 9 28. Armitage, E.G., Southam, A.D.: Monitoring cancer prognosis,  
10 diagnosis and treatment efficacy using metabolomics and lipidomics.  
11 *Metabolomics* **12**(9), 146 (2016). doi:[10.1007/s11306-016-1093-7](https://doi.org/10.1007/s11306-016-1093-7)
- 12 29. Zamboni, N., Saghatelian, A., Patti, G.J.: Defining the Metabolome:  
13 Size, Flux, and Regulation. *Molecular Cell* **58**(4), 699–706 (2015).  
14 doi:[10.1016/j.molcel.2015.04.021](https://doi.org/10.1016/j.molcel.2015.04.021)
- 15 30. Buescher, J.M., Antoniewicz, M.R., Boros, L.G., Burgess, S.C.,  
16 Brunengraber, H., Clish, C.B., DeBerardinis, R.J., Feron, O., Frezza,  
17 C., Ghesquiere, B., Gottlieb, E., Hiller, K., Jones, R.G., Kamphorst,  
18 J.J., Kibbey, R.G., Kimmelman, A.C., Locasale, J.W., Lunt, S.Y.,  
19 Maddocks, O.D., Malloy, C., Metallo, C.M., Meillet, E.J., Munger, J.,  
20 Nöh, K., Rabinowitz, J.D., Ralser, M., Sauer, U., Stephanopoulos, G.,  
21 St-Pierre, J., Tennant, D.A., Wittmann, C., Vander Heiden, M.G.,  
22 Vazquez, A., Voudsen, K., Young, J.D., Zamboni, N., Fendt, S.-M.: A  
23 roadmap for interpreting 13C metabolite labeling patterns from cells.  
24 *Current Opinion in Biotechnology* **34**, 189–201 (2015).  
25 doi:[10.1016/j.copbio.2015.02.003](https://doi.org/10.1016/j.copbio.2015.02.003)
- 26 31. Eicher, T., Kinnebrew, G., Patt, A., Spencer, K., Ying, K., Ma, Q.,  
27 Machiraju, R., Mathé, E.A.: Metabolomics and Multi-Omics  
28 Integration: A Survey of Computational Methods and Resources.  
29 *Metabolites* **10**(5), 202 (2020). doi:[10.3390/metabo10050202](https://doi.org/10.3390/metabo10050202)
- 30 32. Meng, C., Kuster, B., Culhane, A.C., Gholami, A.M.: A multivariate  
31 approach to the integration of multi-omics datasets. *BMC*  
32 *Bioinformatics* **15**(1), 162 (2014). doi:[10.1186/1471-2105-15-162](https://doi.org/10.1186/1471-2105-15-162)
- 33 33. Rampler, E., Abiead, Y.E., Schoeny, H., Rusz, M., Hildebrand, F.,  
34 Fitz, V., Koellensperger, G.: Recurrent Topics in Mass  
35 Spectrometry-Based Metabolomics and Lipidomics—Standardization,  
36 Coverage, and Throughput. *Analytical Chemistry* **93**(1), 519–545  
37 (2021). doi:[10.1021/acs.analchem.0c04698](https://doi.org/10.1021/acs.analchem.0c04698)
- 38 34. Chen, Y.-X., Chen, H., Rong, Y., Jiang, F., Chen, J.-B., Duan, Y.-Y.,  
39 Zhu, D.-L., Yang, T.-L., Dai, Z., Dong, S.-S., Guo, Y.: An integrative  
40 multi-omics network-based approach identifies key regulators for breast  
41 cancer. *Computational and Structural Biotechnology Journal* **18**,  
42 2826–2835 (2020). doi:[10.1016/j.csbj.2020.10.001](https://doi.org/10.1016/j.csbj.2020.10.001)
- 43 35. Ghaffari, S., Hanson, C., Schmidt, R.E., Bouchonville, K.J., Offer,  
44 S.M., Sinha, S.: An integrated multi-omics approach to identify  
45 regulatory mechanisms in cancer metastatic processes. *Genome*  
46 *Biology* **22**(1), 19 (2021). doi:[10.1186/s13059-020-02213-x](https://doi.org/10.1186/s13059-020-02213-x)
- 47 36. Bordbar, A., Monk, J.M., King, Z.A., Palsson, B.O.: Constraint-based  
48 models predict metabolic and associated cellular functions. *Nature*  
49 *Reviews Genetics* **15**(2), 107–120 (2014). doi:[10.1038/nrg3643](https://doi.org/10.1038/nrg3643)
- 50 37. Pandey, V., Hadadi, N., Hatzimanikatis, V.: Enhanced flux prediction  
51 by integrating relative expression and relative metabolite abundance  
52 into thermodynamically consistent metabolic models. *PLOS*  
53 *Computational Biology* **15**(5), 1007036 (2019).  
54 doi:[10.1371/journal.pcbi.1007036](https://doi.org/10.1371/journal.pcbi.1007036)
- 55 38. Yizhak, K., Chaneton, B., Gottlieb, E., Ruppin, E.: Modeling cancer  
56 metabolism on a genome scale. *Molecular Systems Biology* **11**(6), 817  
57 (2015). doi:[10.15252/msb.20145307](https://doi.org/10.15252/msb.20145307)
- 58 39. Yizhak, K., Benyamini, T., Liebermeister, W., Ruppin, E., Shlomi, T.:  
59 Integrating quantitative proteomics and metabolomics with a  
60 genome-scale metabolic network model. *Bioinformatics* **26**(12),  
61 255–260 (2010). doi:[10.1093/bioinformatics/btq183](https://doi.org/10.1093/bioinformatics/btq183)
- 62 40. Zur, H., Ruppin, E., Shlomi, T.: iMAT: an integrative metabolic  
63 analysis tool. *Bioinformatics* **26**(24), 3140–3142 (2010).  
64 doi:[10.1093/bioinformatics/btq602](https://doi.org/10.1093/bioinformatics/btq602)
- 65 41. Agren, R., Mardinoglu, A., Asplund, A., Kampf, C., Uhlen, M., Nielsen,  
66 J.: Identification of anticancer drugs for hepatocellular carcinoma  
67 through personalized genome-scale metabolic modeling. *Molecular*  
68 *Systems Biology* **10**(3), 721 (2014). doi:[10.1002/msb.145122](https://doi.org/10.1002/msb.145122)
- 69 42. Lewis, N.E., Nagarajan, H., Palsson, B.O.: Constraining the metabolic  
70 genotype–phenotype relationship using a phylogeny of in silico  
71 methods. *Nature Reviews Microbiology* **10**(4), 291–305 (2012).  
72 doi:[10.1038/nrmicro2737](https://doi.org/10.1038/nrmicro2737)
- 73 43. O'Brien, E.J., Lerman, J.A., Chang, R.L., Hyduke, D.R., Palsson, B.:  
74 Genome-scale models of metabolism and gene expression extend and  
75 refine growth phenotype prediction. *Molecular Systems Biology* **9**(1),  
76 693 (2013). doi:[10.1038/msb.2013.52](https://doi.org/10.1038/msb.2013.52)
- 77 44. Orth, J.D., Thiele, I., Palsson, B.Ø.: What is flux balance analysis?  
78 *Nature Biotechnology* **28**(3), 245–248 (2010). doi:[10.1038/nbt.1614](https://doi.org/10.1038/nbt.1614)
- 79 45. Henry, C.S., Broadbelt, L.J., Hatzimanikatis, V.:  
80 Thermodynamics-Based Metabolic Flux Analysis. *Biophysical Journal*  
81 **92**(5), 1792–1805 (2007). doi:[10.1529/biophysj.106.093138](https://doi.org/10.1529/biophysj.106.093138)
- 82 46. Salvy, P., Fengos, G., Ataman, M., Pathier, T., Soh, K.C.,  
83 Hatzimanikatis, V.: pyTFA and matTFA: a Python package and a  
84 Matlab toolbox for Thermodynamics-based Flux Analysis.  
85 *Bioinformatics* **35**(1), 167–169 (2019).  
86 doi:[10.1093/bioinformatics/bty499](https://doi.org/10.1093/bioinformatics/bty499)
- 87 47. Aurich, M.K., Paglia, G., Rolfsson, Ó., Hrafnisdóttir, S., Magnúsdóttir,  
88 M., Stefaniak, M.M., Palsson, B.Ø., Fleming, R.M.T., Thiele, I.:  
89 Prediction of intracellular metabolic states from extracellular  
90 metabolomic data. *Metabolomics* **11**(3), 603–619 (2015).  
91 doi:[10.1007/s11306-014-0721-3](https://doi.org/10.1007/s11306-014-0721-3)
- 92 48. Masid, M., Ataman, M., Hatzimanikatis, V.: Analysis of human  
93 metabolism by reducing the complexity of the genome-scale models  
94 using redHUMAN. *Nature Communications* **11**(1), 2821 (2020).  
95 doi:[10.1038/s41467-020-16549-2](https://doi.org/10.1038/s41467-020-16549-2)
- 96 49. Volkova, S., Matos, M.R.A., Mattanovich, M., Marín de Mas, I.:  
97 Metabolic Modelling as a Framework for Metabolomics Data  
98 Integration and Analysis. *Metabolites* **10**(8), 303 (2020).  
99 doi:[10.3390/metabo10080303](https://doi.org/10.3390/metabo10080303)
- 100 50. Zielinski, D.C., Jamshidi, N., Corbett, A.J., Bordbar, A., Thomas, A.,  
101 Palsson, B.Ø.: Systems biology analysis of drivers underlying hallmarks  
102 of cancer cell metabolism. *Scientific Reports* **7**(1), 41241 (2017).  
103 doi:[10.1038/srep41241](https://doi.org/10.1038/srep41241)
- 104 51. Jungwirth, U., Xanthos, D.N., Gojo, J., Bytzeck, A.K., Körner, W.,  
105 Heffeter, P., Abramkin, S.A., Jakupec, M.A., Hartinger, C.G.,  
106 Windberger, U., *et al.*: Anticancer activity of methyl-substituted  
107 oxalipatin analogs. *Molecular pharmacology* **81**(5), 719–728 (2012)
- 108 52. Galvez, L., Rusz, M., Schwaiger-Haber, M., Abiead, Y.E., Hermann,  
109 G., Jungwirth, U., Berger, W., Keppler, B.K., Jakupec, M.A.,  
110 Koellensperger, G.: Preclinical studies on metal based anticancer drugs  
111 as enabled by integrated metallomics and metabolomics. *Metallomics*  
112 **11**(10), 1716–1728 (2019). doi:[10.1039/C9MT00141G](https://doi.org/10.1039/C9MT00141G)
- 113 53. Rusz, M., Del Favero, G., El Abiead, Y., Gerner, C., Keppler, B.K.,  
114 Jakupec, M.A., Koellensperger, G.: Morpho-metabotyping the  
115 oxidative stress response. *Scientific Reports*, (2021)
- 116 54. Schwaiger, M., Schoeny, H., Abiead, Y.E., Hermann, G., Rampler, E.,  
117 Koellensperger, G.: Merging metabolomics and lipidomics into one  
118 analytical run. *Analyst* **144**(1), 220–229 (2018).  
119 doi:[10.1039/C8AN01219A](https://doi.org/10.1039/C8AN01219A)
- 120 55. Oberhuber, M., Pecoraro, M., Rusz, M., Oberhuber, G., Wieselberg,  
121 M., Haslinger, P., Gurnhofer, E., Schleder, M., Limberger, T.,  
122 Lager, S., Pencik, J., Kodajova, P., Högl, S., Stockmaier, G.,  
123 Grund-Gröschke, S., Aberger, F., Bolis, M., Theurillat, J.-P.,  
124 Wiebringhaus, R., Weiss, T., Haitel, A., Brehme, M., Wadsak, W.,  
125 Griss, J., Mohr, T., Hofer, A., Jäger, A., Pollheimer, J., Egger, G.,  
126 Koellensperger, G., Mann, M., Hantusch, B., Kenner, L.:  
127 STAT3-dependent analysis reveals PDK4 as independent predictor of  
128 recurrence in prostate cancer. *Molecular Systems Biology* **16**(4), 9247  
129 (2020). doi:[10.15252/msb.20199247](https://doi.org/10.15252/msb.20199247)
- 130 56. Szélliová, D., Schoeny, H., Knez, v., Troyer, C., Coman, C., Rampler,  
131 E., Koellensperger, G., Ahrends, R., Hann, S., Borth, N., Zanghellini,  
132 J., Ruckerbauer, D.E.: Robust Analytical Methods for the Accurate  
133 Quantification of the Total Biomass Composition of Mammalian Cells.  
134 In: Nagrath, D. (ed.) *Metabolic Flux Analysis in Eukaryotic Cells: Methods*  
135 *And Protocols. Methods in Molecular Biology*, pp. 119–160.  
136 Springer, New York, NY (2020). doi:[10.1007/978-1-0716-0159-4\\_7](https://doi.org/10.1007/978-1-0716-0159-4_7)
- 137 57. Robinson, J.L., Kocabaş, P., Wang, H., Cholley, P.-E., Cook, D.,  
138 Nilsson, A., Anton, M., Ferreira, R., Domenzain, I., Billa, V., Limeta,  
139 A., Hedin, A., Gustafsson, J., Kerkhoven, E.J., Svensson, L.T.,  
140 Palsson, B.Ø., Mardinoglu, A., Hansson, L., Uhlén, M., Nielsen, J.: An  
141 atlas of human metabolism. *Science Signaling* **13**(624) (2020).

- 1 doi:[10.1126/scisignal.aaz1482](https://doi.org/10.1126/scisignal.aaz1482)
258. Hart, T., Chandrashekar, M., Aregger, M., Steinhart, Z., Brown, K.R., MacLeod, G., Mis, M., Zimmermann, M., Fradet-Turcotte, A., Sun, S., Mero, P., Dirks, P., Sidhu, S., Roth, F.P., Rissland, O.S., Durocher, D., Angers, S., Moffat, J.: High-Resolution CRISPR Screens Reveal Fitness Genes and Genotype-Specific Cancer Liabilities. *Cell* **163**(6), 1515–1526 (2015). doi:[10.1016/j.cell.2015.11.015](https://doi.org/10.1016/j.cell.2015.11.015)
59. Széliyová, D., Ruckerbauer, D.E., Galleguillos, S.N., Petersen, L.B., Natter, K., Hanscho, M., Troyer, C., Causon, T., Schoeny, H., Christensen, H.B., Lee, D.-Y., Lewis, N.E., Koellensperger, G., Hann, S., Nielsen, L.K., Borth, N., Zanghellini, J.: What CHO is made of: Variations in the biomass composition of Chinese hamster ovary cell lines. *Metabolic Engineering* **61**, 288–300 (2020). doi:[10.1016/j.ymben.2020.06.002](https://doi.org/10.1016/j.ymben.2020.06.002)
60. Jain, M., Nilsson, R., Sharma, S., Madhusudhan, N., Kitami, T., Souza, A.L., Kafri, R., Kirschner, M.W., Clish, C.B., Mootha, V.K.: Metabolite Profiling Identifies a Key Role for Glycine in Rapid Cancer Cell Proliferation. *Science* **336**(6084), 1040–1044 (2012). doi:[10.1126/science.1218595](https://doi.org/10.1126/science.1218595)
61. Else, P.L.: The highly unnatural fatty acid profile of cells in culture. *Progress in Lipid Research* **77**, 101017 (2020). doi:[10.1016/j.plipres.2019.101017](https://doi.org/10.1016/j.plipres.2019.101017)
62. Gregory, M.K., King, H.W., Bain, P.A., Gibson, R.A., Tocher, D.R., Schuller, K.A.: Development of a Fish Cell Culture Model to Investigate the Impact of Fish Oil Replacement on Lipid Peroxidation. *Lipids* **46**(8), 753–764 (2011). doi:[10.1007/s11745-011-3558-9](https://doi.org/10.1007/s11745-011-3558-9)
63. Lewis, N.E., Hixson, K.K., Conrad, T.M., Lerman, J.A., Charusanti, P., Polpitiya, A.D., Adkins, J.N., Schramm, G., Purvine, S.O., Lopez-Ferrer, D., Weitz, K.K., Eils, R., König, R., Smith, R.D., Palsson, B.Ø.: Omic data from evolved *E. coli* are consistent with computed optimal growth from genome-scale models. *Molecular Systems Biology* **6**(1), 390 (2010). doi:[10.1038/msb.2010.47](https://doi.org/10.1038/msb.2010.47)
64. Gudmundsson, S., Thiele, I.: Computationally efficient flux variability analysis. *BMC Bioinformatics* **11**(1), 489 (2010). doi:[10.1186/1471-2105-11-489](https://doi.org/10.1186/1471-2105-11-489)
65. Ebrahim, A., Lerman, J.A., Palsson, B.O., Hyduke, D.R.: Cobrapy: constraints-based reconstruction and analysis for python. *BMC systems biology* **7**(1), 1–6 (2013)
66. Warburg, O.: Über den Stoffwechsel der Carcinomzelle. *Naturwissenschaften* **12**(50), 1131–1137 (1924). doi:[10.1007/BF01504608](https://doi.org/10.1007/BF01504608)
67. Brown, R.E., Short, S.P., Williams, C.S.: Colorectal Cancer and Metabolism. *Current Colorectal Cancer Reports* **14**(6), 226–241 (2018). doi:[10.1007/s11888-018-0420-y](https://doi.org/10.1007/s11888-018-0420-y)
68. Li, T., Le, A.: Glutamine Metabolism in Cancer. In: Le, A. (ed.) *The Heterogeneity of Cancer Metabolism*. *Advances in Experimental Medicine and Biology*, pp. 13–32. Springer, ??? (2018). doi:[10.1007/978-3-319-77736-8\\_2](https://doi.org/10.1007/978-3-319-77736-8_2)
69. Wu, M., Neilson, A., Swift, A.L., Moran, R., Tamagnine, J., Parslow, D., Armistead, S., Lemire, K., Orrell, J., Teich, J., Chomicz, S., Ferrick, D.A.: Multiparameter metabolic analysis reveals a close link between attenuated mitochondrial bioenergetic function and enhanced glycolysis dependency in human tumor cells. *American Journal of Physiology. Cell Physiology* **292**(1), 125–136 (2007). doi:[10.1152/ajpcell.00247.2006](https://doi.org/10.1152/ajpcell.00247.2006)
70. Uhlen, M., Zhang, C., Lee, S., Sjöstedt, E., Fagerberg, L., Bidkhori, G., Benfeitas, R., Arif, M., Liu, Z., Edfors, F., Sanli, K., Felitzen, K.v., Oksvold, P., Lundberg, E., Hober, S., Nilsson, P., Mattsson, J., Schwenk, J.M., Brunnström, H., Glimelius, B., Sjöblom, T., Edqvist, P.-H., Djureinovic, D., Mücke, P., Lindskog, C., Mardinoglu, A., Ponten, F.: A pathology atlas of the human cancer transcriptome. *Science* **357**(6352) (2017). doi:[10.1126/science.aan2507](https://doi.org/10.1126/science.aan2507)
71. Balcells, C., Foguet, C., Tarragó-Celada, J., de Atauri, P., Marin, S., Cascante, M.: Tracing metabolic fluxes using mass spectrometry: Stable isotope-resolved metabolomics in health and disease. *TrAC Trends in Analytical Chemistry* **120**, 115371 (2019). doi:[10.1016/j.trac.2018.12.025](https://doi.org/10.1016/j.trac.2018.12.025)
72. Yao, C.-H., Fowle-Grider, R., Mahieu, N.G., Liu, G.-Y., Chen, Y.-J., Wang, R., Singh, M., Potter, G.S., Gross, R.W., Schaefer, J., Johnson, S.L., Patti, G.J.: Exogenous Fatty Acids Are the Preferred Source of Membrane Lipids in Proliferating Fibroblasts. *Cell Chemical Biology* **23**(4), 483–493 (2016). doi:[10.1016/j.chembiol.2016.03.007](https://doi.org/10.1016/j.chembiol.2016.03.007)
73. Yao, C.-H., Liu, G.-Y., Yang, K., Gross, R.W., Patti, G.J.: Inaccurate quantitation of palmitate in metabolomics and isotope tracer studies due to plastics. *Metabolomics* **12**(9), 1–7 (2016)
74. Hasenour, C.M., Rahim, M., Young, J.D.: In Vivo Estimates of Liver Metabolic Flux Assessed by <sup>13</sup>C-Propionate and <sup>13</sup>C-Lactate Are Impacted by Tracer Recycling and Equilibrium Assumptions. *Cell Reports* **32**(5) (2020). doi:[10.1016/j.celrep.2020.107986](https://doi.org/10.1016/j.celrep.2020.107986)
75. Williams, T.C.R., Miguet, L., Masakapalli, S.K., Kruger, N.J., Sweetlove, L.J., Ratcliffe, R.G.: Metabolic Network Fluxes in Heterotrophic Arabidopsis Cells: Stability of the Flux Distribution under Different Oxygenation Conditions. *Plant Physiology* **148**(2), 704–718 (2008). doi:[10.1104/pp.108.125195](https://doi.org/10.1104/pp.108.125195)
76. Wu, Y., Li, L.: Sample normalization methods in quantitative metabolomics. *Journal of Chromatography A* **1430**, 80–95 (2016). doi:[10.1016/j.chroma.2015.12.007](https://doi.org/10.1016/j.chroma.2015.12.007)
77. Chan, S., Cai, J., Wang, L., Simons-Senftle, M., Maranas, C.: Standardizing biomass reactions and ensuring complete mass balance in genome-scale metabolic models. *Bioinformatics* **33**(22), 3603–3609 (2017). doi:[10.1093/bioinformatics/btx453](https://doi.org/10.1093/bioinformatics/btx453)
78. Pereira, Nielsen, J., Rocha, I.: Improving the flux distributions simulated with genome-scale metabolic models of *saccharomyces cerevisiae*. *Metabolic Engineering Communications* **3**(1), 153–163 (2016). doi:[10.1016/j.meteno.2016.05.002](https://doi.org/10.1016/j.meteno.2016.05.002)
79. Yuan, H., Cheung, M., Hilbers, P., van Riel, N.: Flux balance analysis of plant metabolism: The effect of biomass composition and model structure on model predictions. *Frontiers in Plant Sciences* **7**(1), 537 (2016). doi:[10.3389/fpls.2016.00537](https://doi.org/10.3389/fpls.2016.00537)
80. Dubuis, S., Ortmayr, K., Zampieri, M.: A framework for large-scale metabolome drug profiling links coenzyme a metabolism to the toxicity of anti-cancer drug dichloroacetate. *Communications biology* **1**(1), 1–11 (2018)
81. Ortmayr, K., Dubuis, S., Zampieri, M.: Metabolic profiling of cancer cells reveals genome-wide crosstalk between transcriptional regulators and metabolism. *Nature communications* **10**(1), 1–13 (2019)
82. Nam, H., Campodonico, M., Bordbar, A., Hyduke, D., Kim, S., Zielinski, D., Palsson, B.: A systems approach to predict oncometabolites via context-specific genome-scale metabolic networks. *PLoS Computational Biology* **10**(9), 1003837 (2014). doi:[10.1371/journal.pcbi.1003837](https://doi.org/10.1371/journal.pcbi.1003837)
83. Turanli, B., Zhang, C., Kim, W., Benfeitas, R., Uhlen, M., Arga, K., Mardinoglu, A.: Discovery of therapeutic agents for prostate cancer using genome-scale metabolic modeling and drug repositioning. *EBioMedicine* **42**, 386–396 (2019). doi:[10.1016/j.ebiom.2019.03.009](https://doi.org/10.1016/j.ebiom.2019.03.009)
84. McGuirk, S., Audet-Delage, Y., St-Pierre, J.: Metabolic Fitness and Plasticity in Cancer Progression. *Trends in Cancer* **6**(1), 49–61 (2020). doi:[10.1016/j.trecan.2019.11.009](https://doi.org/10.1016/j.trecan.2019.11.009)
85. Lee, S., Jang, W.-J., Choi, B., Joo, S.H., Jeong, C.-H.: Comparative metabolomic analysis of HPAc cells following the acquisition of erlotinib resistance. *Oncology Letters* **13**(5), 3437–3444 (2017). doi:[10.3892/ol.2017.5940](https://doi.org/10.3892/ol.2017.5940)
86. Fan, T.W.-M., El-Amouri, S.S., Macedo, J.K.A., Wang, Q.J., Song, H., Cassel, T., Lane, A.N.: Stable Isotope-Resolved Metabolomics Shows Metabolic Resistance to Anti-Cancer Selenite in 3D Spheroids versus 2D Cell Cultures. *Metabolites* **8**(3), 40 (2018). doi:[10.3390/metabo8030040](https://doi.org/10.3390/metabo8030040)
87. Ricci, F., Brunelli, L., Affatato, R., Chilà, R., Verza, M., Indraccolo, S., Falchetta, F., Fratelli, M., Fruscio, R., Pastorelli, R., Damia, G.: Overcoming platinum-acquired resistance in ovarian cancer patient-derived xenografts. *Therapeutic Advances in Cancer Oncology* **11**, 1758835919839543 (2019). doi:[10.1177/1758835919839543](https://doi.org/10.1177/1758835919839543)
88. Ruzs, M., Rampler, E., Keppler, B.K., Jakupec, M.A., Koellensperger, G.: Single Spheroid Metabolomics: Optimizing Sample Preparation of Three-Dimensional Multicellular Tumor Spheroids. *Metabolites* **9**(12), 304 (2019). doi:[10.3390/metabo9120304](https://doi.org/10.3390/metabo9120304)
89. Cavill, R., Kamburov, A., Ellis, J.K., Athersuch, T.J., Blagrove, M.S.C., Herwig, R., Ebbels, T.M.D., Keun, H.C.: Consensus-Phenotype Integration of Transcriptomic and Metabolomic Data Implies a Role for Metabolism in the Chemosensitivity of Tumor Cells. *PLoS Computational Biology* **7**(3), 1001113 (2011). doi:[10.1371/journal.pcbi.1001113](https://doi.org/10.1371/journal.pcbi.1001113)

|    |     |                                                                                                                                     |    |
|----|-----|-------------------------------------------------------------------------------------------------------------------------------------|----|
| 1  | 90. | Jungwirth, U., Kowol, C.R., Keppler, B.K., Hartinger, C.G., Berger,                                                                 | 1  |
| 2  |     | W., Heffeter, P.: Anticancer Activity of Metal Complexes: Involvement                                                               | 2  |
| 3  |     | of Redox Processes. <i>Antioxidants &amp; Redox Signaling</i> <b>15</b> (4), 1085–1127                                              | 3  |
| 4  |     | (2011). doi: <a href="https://doi.org/10.1089/ars.2010.3663">10.1089/ars.2010.3663</a>                                              | 4  |
| 5  | 91. | Gibson, D.: The mechanism of action of platinum anticancer                                                                          | 5  |
| 6  |     | agents—what do we really know about it? <i>Dalton Transactions</i> (48),                                                            | 6  |
| 7  |     | 10681–10689 (2009). doi: <a href="https://doi.org/10.1039/B918871C">10.1039/B918871C</a>                                            | 7  |
| 8  | 92. | Kelland, L.: The resurgence of platinum-based cancer chemotherapy.                                                                  | 8  |
| 9  |     | <i>Nature Reviews Cancer</i> <b>7</b> (8), 573–584 (2007). doi: <a href="https://doi.org/10.1038/nrc2167">10.1038/nrc2167</a>       | 9  |
| 10 | 93. | Lizardo, M.M., Morrow, J.J., Miller, T.E., Hong, E.S., Ren, L.,                                                                     | 10 |
| 11 |     | Mendoza, A., Halsey, C.H., Scacheri, P.C., Helman, L.J., Khanna, C.:                                                                | 11 |
| 12 |     | Upregulation of Glucose-Regulated Protein 78 in Metastatic Cancer                                                                   | 12 |
| 13 |     | Cells Is Necessary for Lung Metastasis Progression. <i>Neoplasia</i> <b>18</b> (11),                                                | 13 |
| 14 |     | 699–710 (2016). doi: <a href="https://doi.org/10.1016/j.neo.2016.09.001">10.1016/j.neo.2016.09.001</a>                              | 14 |
| 15 | 94. | Gottesman, M.M., Fojo, T., Bates, S.E.: Multidrug resistance in                                                                     | 15 |
| 16 |     | cancer: role of atp-dependent transporters. <i>Nature Reviews Cancer</i>                                                            | 16 |
| 17 |     | <b>2</b> (1), 48–58 (2002)                                                                                                          | 17 |
| 18 | 95. | Drury, J., Rychahou, P.G., He, D., Jafari, N., Wang, C., Lee, E.Y.,                                                                 | 18 |
| 19 |     | Weiss, H.L., Evers, B.M., Zaytseva, Y.Y.: Inhibition of Fatty Acid                                                                  | 19 |
| 20 |     | Synthase Upregulates Expression of CD36 to Sustain Proliferation of                                                                 | 20 |
| 21 |     | Colorectal Cancer Cells. <i>Frontiers in Oncology</i> <b>10</b> (2020).                                                             | 21 |
| 22 |     | doi: <a href="https://doi.org/10.3389/fonc.2020.01185">10.3389/fonc.2020.01185</a>                                                  | 22 |
| 23 | 96. | Valli, A., Rodríguez, M., Moutsianas, L., Fischer, R., Fedele, V.,                                                                  | 23 |
| 24 |     | Huang, H.-L., Stiphout, R.V., Jones, D., Mccarthy, M., Vinaxia, M.,                                                                 | 24 |
| 25 |     | Igarashi, K., Sato, M., Soga, T., Buffa, F., Mccullagh, J., Yanes, O.,                                                              | 25 |
| 26 |     | Harris, A., Kessler, B.: Hypoxia induces a lipogenic cancer cell                                                                    | 26 |
| 27 |     | phenotype via HIF1 $\alpha$ -dependent and -independent pathways.                                                                   | 27 |
| 28 |     | <i>Oncotarget</i> <b>6</b> , 1920–1941 (2014). doi: <a href="https://doi.org/10.18632/oncotarget.3058">10.18632/oncotarget.3058</a> | 28 |
| 29 | 97. | Haug, K., Cochrane, K., Nainala, V.C., Williams, M., Chang, J.,                                                                     | 29 |
| 30 |     | Jayaseelan, K.V., O'Donovan, C.: MetaboLights: a resource evolving in                                                               | 30 |
| 31 |     | response to the needs of its scientific community. <i>Nucleic Acids</i>                                                             | 31 |
| 32 |     | <i>Research</i> <b>48</b> (D1), 440–444 (2020). doi: <a href="https://doi.org/10.1093/nar/gkz1019">10.1093/nar/gkz1019</a>          | 32 |
| 33 |     |                                                                                                                                     | 33 |
| 34 |     |                                                                                                                                     | 34 |
| 35 |     |                                                                                                                                     | 35 |
| 36 |     |                                                                                                                                     | 36 |
| 37 |     |                                                                                                                                     | 37 |
| 38 |     |                                                                                                                                     | 38 |
| 39 |     |                                                                                                                                     | 39 |
| 40 |     |                                                                                                                                     | 40 |
| 41 |     |                                                                                                                                     | 41 |
| 42 |     |                                                                                                                                     | 42 |
| 43 |     |                                                                                                                                     | 43 |
| 44 |     |                                                                                                                                     | 44 |
| 45 |     |                                                                                                                                     | 45 |
| 46 |     |                                                                                                                                     | 46 |
| 47 |     |                                                                                                                                     | 47 |
| 48 |     |                                                                                                                                     | 48 |
| 49 |     |                                                                                                                                     | 49 |
| 50 |     |                                                                                                                                     | 50 |
| 51 |     |                                                                                                                                     | 51 |
| 52 |     |                                                                                                                                     | 52 |
| 53 |     |                                                                                                                                     | 53 |
| 54 |     |                                                                                                                                     | 54 |
| 55 |     |                                                                                                                                     | 55 |
